# Supplementary material for: Linker desymmetrisation directs low-polar cages in an anion-pillared MOF for acetylene and ethylene purification from ternary mixtures
Source: Royal Society of Chemistry journal article supplement (doi:10.1039/d6sc00819d), 2026-04-10
Supplement: d6sc00819d1.pdf [file d6sc00819d1.pdf]

## Supporting Information

# Linker Desymmetrisation Directs Low-polar Cages in an Anion-Pillared MOF for Acetylene and Ethylene Purification from Ternary Mixtures

Jun-Jie Wu<sup>a</sup>, Peng-Dan Zhang<sup>a,c,\*</sup>, Xue-Qian Wu<sup>a,\*</sup>, Shuai-Hao Huang<sup>a</sup>, Wen-Wen Dong<sup>a</sup>,

Ya-Pan Wu<sup>a</sup>, Dong-Sheng Li<sup>a,b,\*</sup>

<sup>a</sup>College of Materials and Chemical Engineering, China Three Gorges University,  
Yichang 443002, P. R. China.

<sup>b</sup>Hubei Three Gorges Laboratory, Yichang 443007, Hubei, P. R. China.

<sup>c</sup>College of Hydraulic & Environmental Engineering, China Three Gorges University,  
Yichang 443002, P. R. China.

\*Corresponding Author(s): Peng-Dan Zhang: [dana929@163.com](mailto:dana929@163.com); Xue-Qian Wu:  
[wuxueqiansnail@163.com](mailto:wuxueqiansnail@163.com), Dong-Sheng Li: [lidongsheng1@126.com](mailto:lidongsheng1@126.com).

## Experimental procedures

### Materials synthesis

All the chemicals essential for the experiments were purchased conveniently from the market and used directly without any further purification. Powder X-ray diffraction (PXRD) patterns were obtained via a Rigaku Ultima IV X-ray powder diffractometer with CuK $\alpha$  radiation, ( $\lambda = 1.5406 \text{ \AA}$ ) at room temperature (RT). The thermal stability research was conducted on a TGA-50 thermal analyzer with a heating rate of  $10 \text{ }^\circ\text{C min}^{-1}$  under Air atmosphere.

### Synthesis of CTGU-45.

Crystalline CTGU-45 was synthesized through solvothermal reaction method. Cu(AC) $_2$ ·H $_2$ O (20.0 mg, 0.6 mmol), TIB ligand (13.8 mg, 0.15 mmol) were dissolved in a solvent mixture of 1 mL of N, N-Dimethylacetamide (DMA), 3 mL of H $_2$ O, 0.3 mL of HBF $_4$  (37 wt%). The above solution was then transferred and sealed in a 25 mL glass tube, at a 373 K oven for 24 h. After being cooled naturally to room temperature, granular blue crystals of CTGU-45 were obtained through washing several times with DMA and MeOH (yield: about 50% based on Cu(AC) $_2$ ·H $_2$ O).

### Single crystal X-ray diffraction analysis

Single crystal X-ray diffraction (SCXRD) analysis was carried out on a Rigaku Supernova CCD diffractometer equipped with a mirror monochromated enhanced Cu-K $\alpha$  radiation ( $\lambda = 1.54184 \text{ \AA}$ ) at 296 K. Using SHELXTL and Olex2 software package, the structure was solved by ShelXT solution program with the intrinsic phasing method and refined by full-matrix least-squares on  $F^2$  with anisotropic displacement.<sup>1-2</sup> Hydrogen atoms of the framework were calculated in ideal positions with isotropic displacement parameters. The guest molecules were highly disordered and could not be

modeled properly, and the residual electron densities resulting from them were removed by the SQUEEZE routine in PLATON (the details were appended in the CIF file). Crystallographic data for CTGU-45 have been deposited in the Cambridge Crystallographic Data Centre (CCDC number: 2522768). These data can be obtained free of charge via [deposit@ccdc.cam.ac.uk](mailto:deposit@ccdc.cam.ac.uk). Selected crystal parameters and structure refinement details are listed in Table S1.

Table S1. Crystal data and structure refinements for SIFSIX-TPT-Cu , CTGU-45, and SIFSIX-TPA-Cu

| Name                                    | SIFSIX-TPT-Cu                                                                                     | CTGU-45                                                            | SIFSIX-TPA-Cu                                                                                    |
|-----------------------------------------|---------------------------------------------------------------------------------------------------|--------------------------------------------------------------------|--------------------------------------------------------------------------------------------------|
| Empirical formula                       | C <sub>160</sub> H <sub>112</sub> Cu <sub>6</sub> F <sub>18</sub> N <sub>32</sub> Si <sub>3</sub> | C <sub>20</sub> H <sub>12</sub> CuF <sub>6</sub> N <sub>8</sub> Si | C <sub>120</sub> H <sub>96</sub> Cu <sub>6</sub> F <sub>36</sub> N <sub>32</sub> Si <sub>6</sub> |
| Formula weight                          | 3290.32                                                                                           | 570.01                                                             | 3220.03                                                                                          |
| Temperature/K                           | 446(2)                                                                                            | 296(1)                                                             | 100.00(18)                                                                                       |
| Crystal system                          | Cubic                                                                                             | Cubic                                                              | Cubic                                                                                            |
| Space group                             | <i>Pm-3</i>                                                                                       | <i>Pm-3n</i>                                                       | <i>Pm-3n</i>                                                                                     |
| a (Å)                                   | 21.1882(4)                                                                                        | 16.1908(2)                                                         | 17.5176 (2)                                                                                      |
| b (Å)                                   | 21.1882(4)                                                                                        | 16.1908(2)                                                         | 17.5176 (2)                                                                                      |
| c (Å)                                   | 21.1882(4)                                                                                        | 16.1908(2)                                                         | 17.5176 (2)                                                                                      |
| α (°)                                   | 90                                                                                                | 90                                                                 | 90                                                                                               |
| β (°)                                   | 90                                                                                                | 90                                                                 | 90                                                                                               |
| γ (°)                                   | 90                                                                                                | 90                                                                 | 90                                                                                               |
| Volume (Å <sup>3</sup> )                | 9512.2(5)                                                                                         | 4244.29(9)                                                         | 5375.56 (18)                                                                                     |
| Z                                       | 1                                                                                                 | 6                                                                  | 1                                                                                                |
| ρ <sub>calc</sub> (g cm <sup>-3</sup> ) | 0.574                                                                                             | 1.338                                                              | 0.995                                                                                            |
| μ/mm <sup>-1</sup>                      | 0.743                                                                                             | 2.066                                                              | 1.58                                                                                             |
| Reflections collected                   | 37996                                                                                             | 4734                                                               | 4435                                                                                             |
| Independent data                        | 1866                                                                                              | 803                                                                | 982                                                                                              |
| R <sub>int</sub>                        | 0.1166                                                                                            | 0.0608                                                             | 0.0297                                                                                           |
| Goodness-of-fit on F <sup>2</sup>       | 2.772                                                                                             | 1.125                                                              | 1.080                                                                                            |
| <sup>a</sup> R <sub>1</sub> (I > 2σ(I)) | 0.1701                                                                                            | 0.239                                                              | 0.0395                                                                                           |
| <sup>a</sup> R <sub>1</sub> (all data)  | 0.1950                                                                                            | 0.0959                                                             | 0.0474,                                                                                          |

$$^a R_1 = \sum ||F_o| - |F_c|| / \sum |F_o|.$$

## Static single-component gas adsorption measurements

Before single-component gas adsorption measurements, about 100 mg crystalline samples of CTGU-45 were soaked in 20 mL DMA for 24 h at room temperature. The sample was then immersed in 40 mL of methanol and sealed in a 100 mL glass bottle (fresh methanol was changed every 12 h). Finally, the sample obtained from the previous step was transferred into dichloromethane (20 mL) for another 16 h (fresh solvents were changed every 8 h). After the solvent exchange process was completed, the sample was loaded in a sample tube and further activated under high vacuum at an optimized temperature of 80 °C for 6 h. Bath temperatures of 298 and 308 K were precisely controlled with a recirculating control system containing a mixture of ethylene glycol and water. The lower temperatures (77 and 273 K) were controlled by a Dewar filled with liquid N<sub>2</sub>, and ice-water mixture, respectively.

## Kinetic adsorption measurement

The time-dependent adsorption profiles were measured on BSD-DVS dynamic vapor/gas sorption analyzer. About 800 mg crystalline samples of CTGU-45 were loaded into the sample chamber after the solvent exchange process was completed and activated at 100 °C under N<sub>2</sub> flow (200 mL min<sup>-1</sup>) for 12 h. After being cooled to 25 °C, a single-component gas of C<sub>2</sub>H<sub>2</sub>, C<sub>2</sub>H<sub>4</sub>, C<sub>2</sub>H<sub>6</sub>, CO<sub>2</sub> and CH<sub>4</sub> was introduced into the chamber with a flow rate of 200 mL min<sup>-1</sup>. The mass of the sample loaded with gas molecules was continuously recorded till adsorption reached equilibrium.

## Diffusion time constant

The ratio  $D'$  ( $D_c/r_c^2$ ) is known as the diffusion time constant. It can be further derived from the following micropore diffusion model eq (1).  $D'$  can be obtained from the square of the slope ( $m_t/m_\infty$  plotted against  $\sqrt{t}$ ) multiplied by

$$\frac{m_t}{m_\infty} \approx \frac{6}{r_c \sqrt{\pi}} \sqrt{D_c t} \left( \frac{m_t}{m_\infty} < 0.3 \right) \quad (1)$$

where  $m_t$  is the gas uptake at time  $t$ ,  $m_\infty$  is the gas uptake at equilibrium,  $D_c$  is the intracrystalline diffusivity of gas molecules in porous media, and  $r_c$  is the radius of the equivalent spherical particle.

### Kinetic selectivity

The kinetic selectivity ( $a_{ij}$ ) is defined as

$$a_{ij} = D'_i / D'_j \quad (2)$$

$a_{ij}$  represents the kinetic selectivity based on diffusion rates of the gas molecules and can be obtained from the ratio of diffusion time constant  $D'$ ,  $D'$  can be further derived from the micropore diffusion model eq(1).

### Dynamic breakthrough experiments

Practical gas separation experiments were performed using dynamic breakthrough equipment (BSD-MAB) for the binary  $C_2H_2/CO_2(50/50, v/v)$ ,  $C_2H_2/CO_2/CH_4$  (33.33/33.33/33.33, v/v/v),  $C_2H_6/C_2H_4$  (50/50, 10/90, v/v),  $C_2H_2/C_2H_4$  (50/50, 10/90, v/v), and ternary  $C_2H_2/C_2H_6/C_2H_4$  (1/10/89, v/v/v/v) gas mixtures at 100 kPa and 298 K. Breakthrough experiments were then carried out in a 6 mm diameter glass column of 100 mm length packed with activated CTGU-45, in which  $C_2H_2/CO_2$ ,  $C_2H_6/C_2H_4$ ,  $C_2H_2/C_2H_4$ ,  $C_2H_2/CO_2/CH_4$ ,  $C_2H_2/C_2H_6/C_2H_4$  gas mixture flowed with various total flow rates (4, 1, 1, 6 and 15 mL min<sup>-1</sup>) at 298 K and 1.0 bar. The adsorption column was heated at 80 °C for 6 h under a flow of He (20 mL min<sup>-1</sup>) for complete activation before the measurement. The gas compositions at the

outlet were determined continuously by mass spectrometry (MS). After the contents of outlet gas reached equilibrium, the saturated adsorption bed was regenerated by He flow (10 mL min<sup>-1</sup>) for 120 min at 298 K.

## Analysis of single-component adsorption isotherms

The single-component adsorption isotherms of C<sub>2</sub>H<sub>2</sub>, C<sub>2</sub>H<sub>4</sub>, C<sub>2</sub>H<sub>6</sub>, CO<sub>2</sub> and CH<sub>4</sub> in CTGU-45 were fitted using the single-site/dual-sites Langmuir-Freundlich models<sup>3</sup>.

$$N = A_1 \times \frac{b_1 P^{c_1}}{1 + b_1 P^{c_1}} + A_2 \times \frac{b_2 P^{c_2}}{1 + b_2 P^{c_2}} \quad (3) \quad (A_2 = 0, \text{ single-site model})$$

Here  $N$  is the adsorption amount in cm<sup>3</sup>/g,  $P$  is the pressure of the bulk gas at equilibrium with the adsorbed phase (bar),  $A_1$  and  $A_2$  are the saturation loadings of sites A and B (cm<sup>3</sup>/g),  $b_1$  and  $b_2$  are the affinity coefficients of sites A and B (1/bar),  $C_1$  and  $C_2$  represent the deviations from an ideal homogeneous surface. The fitting parameters of equation (1) for C<sub>2</sub>H<sub>2</sub>, C<sub>2</sub>H<sub>4</sub>, C<sub>2</sub>H<sub>6</sub>, CH<sub>4</sub> and CO<sub>2</sub> are listed in the table (inset: Figure S18-S22). The adsorption selectivity for C<sub>2</sub>H<sub>2</sub>/CO<sub>2</sub>, C<sub>2</sub>H<sub>2</sub>/CH<sub>4</sub>, C<sub>2</sub>H<sub>2</sub>/C<sub>2</sub>H<sub>4</sub> and C<sub>2</sub>H<sub>6</sub>/C<sub>2</sub>H<sub>4</sub> separation was defined by the following equation<sup>4</sup>:

$$S_{1,2} = \frac{q_1/q_2}{P_1/P_2} \quad (4)$$

Here  $q_1$  and  $q_2$  are the equilibrated adsorption molar loading of component 1 and 2 respectively,  $p_1$  and  $p_2$  represent the partial pressure of component 1 and 2 in bulk gas phase.

## Calculation of isosteric heat of adsorption ( $Q_{st}$ )

A virial-type equation comprising of the temperature-independent parameters  $a_i$  and  $b_j$  was employed to calculate the enthalpies of adsorption for C<sub>2</sub>H<sub>2</sub>, C<sub>2</sub>H<sub>4</sub>, C<sub>2</sub>H<sub>6</sub>, CH<sub>4</sub> and CO<sub>2</sub> in CTGU-45, which measured at 273 ,

283 and 298 K<sup>5</sup>.

$$\ln P = \ln N + \frac{1}{T} \sum_{i=0}^m a_i N^i + \sum_{j=0}^n b_j N^j \quad (5)$$

$$Q_{st} = -R \sum_{i=0}^m a_i N^i \quad (6)$$

Here,  $P$  is the pressure expressed in mmHg,  $T$  is the temperature in K,  $a_i$  and  $b_j$  are virial coefficients,  $N$  is the adsorption amount in mg/g and  $m/n$  represent the number of coefficients used to describe the adsorption curves.  $Q_{st}$  is coverage-dependent enthalpy of adsorption and  $R$  is the universal gas constant.

## **Dispersion-corrected density functional theory (DFT-D) calculations**

Theoretical calculations based on the density functional theory (DFT) were conducted using the Dmol<sup>3</sup> module implemented in the Materials Studio software<sup>6</sup>. Van der Waals interactions were illustrated by the calculation with a semiempirical addition of dispersive forces to the conventional DFT (DFT-D3)<sup>7</sup>. Electron-ion interactions were described using the DFT Semi-core Pseudopotentials pseudopotentials (DSPP). A double numerical polarized (DNP) basis set was employed to expand the wave functions with an orbital cutoff of 5.2 Å. For the electron-electron exchange and correlation interactions, a generalized gradient approximation (GGA) with Perdew-Burke-Ernzerhof (PBE) exchange-correlation was utilized<sup>8</sup>. The convergence criterion for the electronic self-consistent field (SCF) loop and the total energy convergence criterion were set to be 10<sup>-6</sup> and 10<sup>-5</sup> (eV atom<sup>-1</sup>), respectively. The structure of CTGU-45 and isolated gas molecules placed in a supercell (with the same cell dimensions as the MOF adsorbent) were also optimized as references. The static binding energy (T= 0 K) was then calculated using  $E_B = E(\text{MOF}) + E(\text{gas}) - E(\text{MOF}+\text{gas})$ . In order to gain the initial positions of the gas molecules within the pore structure, GCMC simulations were carried out firstly by

SORPTION code embedded in the MS.<sup>6</sup> The dispersive and steric repulsive interactions of each atom in CTGU-45 framework and C<sub>2</sub>H<sub>2</sub>/C<sub>2</sub>H<sub>4</sub>/C<sub>2</sub>H<sub>6</sub>/CO<sub>2</sub>/CH<sub>4</sub> adsorbates were both modeled by the universal force field (UFF), which has been widely applied in the molecular simulations for MOFs.<sup>9</sup> The QEq method was used to equilibrate and redistribute the overall charge of atoms of the MOF structure, while the charge distribution situation for C<sub>2</sub>H<sub>2</sub>/C<sub>2</sub>H<sub>4</sub>/C<sub>2</sub>H<sub>6</sub>/CO<sub>2</sub>/CH<sub>4</sub> molecules was calculated through DFT (ESP). Electrostatic interaction was evaluated through Ewald summation method. The cutoff distance was set at 18.5 Å. 20000000 Monte Carlo steps were constructed to simulate the favorable adsorption sites under a fixed pressure, in which the first 10000000 steps were for equilibration and the remains were production steps.

**Table S2.** IAST selectivity and separation coefficient of CTGU-45 for C<sub>3</sub>H<sub>6</sub>/C<sub>2</sub>H<sub>4</sub>

| Molecule                      | Molecular dimensions (Å <sup>3</sup> ) | Kinetic diameter (Å) | Quadrupole moments (×10 <sup>-26</sup> esu cm <sup>2</sup> ) | Polarizability (×10 <sup>-25</sup> cm <sup>3</sup> ) | Boiling point (K) |
|-------------------------------|----------------------------------------|----------------------|--------------------------------------------------------------|------------------------------------------------------|-------------------|
| CH <sub>4</sub>               | 3.7 × 3.7 × 3.7                        | 3.76                 | 0                                                            | 25.9                                                 | 111.6             |
| CO <sub>2</sub>               | 3.2 × 3.3 × 5.4                        | 3.3                  | -4.3                                                         | 29.1                                                 | 194.7             |
| C <sub>2</sub> H <sub>2</sub> | 3.3 × 3.3 × 5.7                        | 3.3                  | 7.5                                                          | 33.3-39.3                                            | 189.3             |
| C <sub>2</sub> H <sub>4</sub> | 3.3×4.2×4.8                            | 4.2                  | 1.5                                                          | 42.5                                                 | 169.4             |
| C <sub>2</sub> H <sub>6</sub> | 3.8×4.1×4.8                            | 4.4                  | 0.65                                                         | 44.3-44.7                                            | 184.5             |

(a)

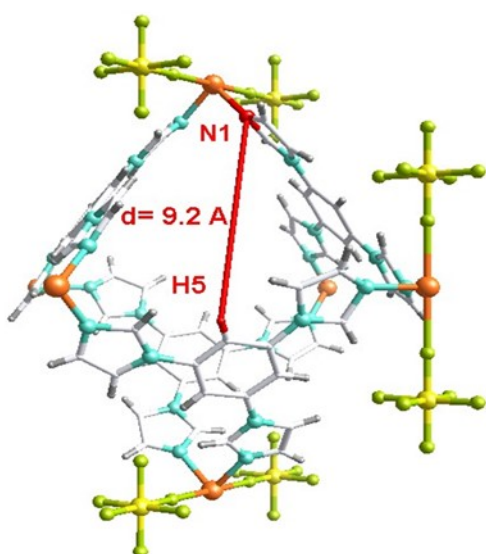

(b)

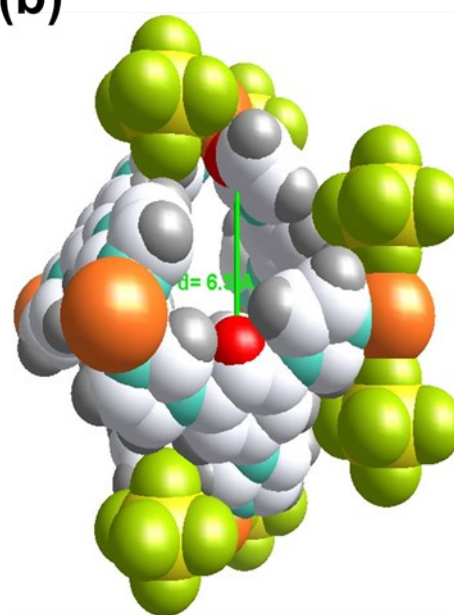

**Figure S1.** Estimation of Window Aperture in CTGU-45. Due to the irregular window geometry, the effective aperture size is estimated from the H5···N1 distance (ca. 9.2 Å). Subtracting the van der Waals radii of H (1.20 Å) and N (1.55 Å) yields an effective aperture of ca. 6.5 Å. (a) Including atomic radii. (b) Excluding atomic radii.

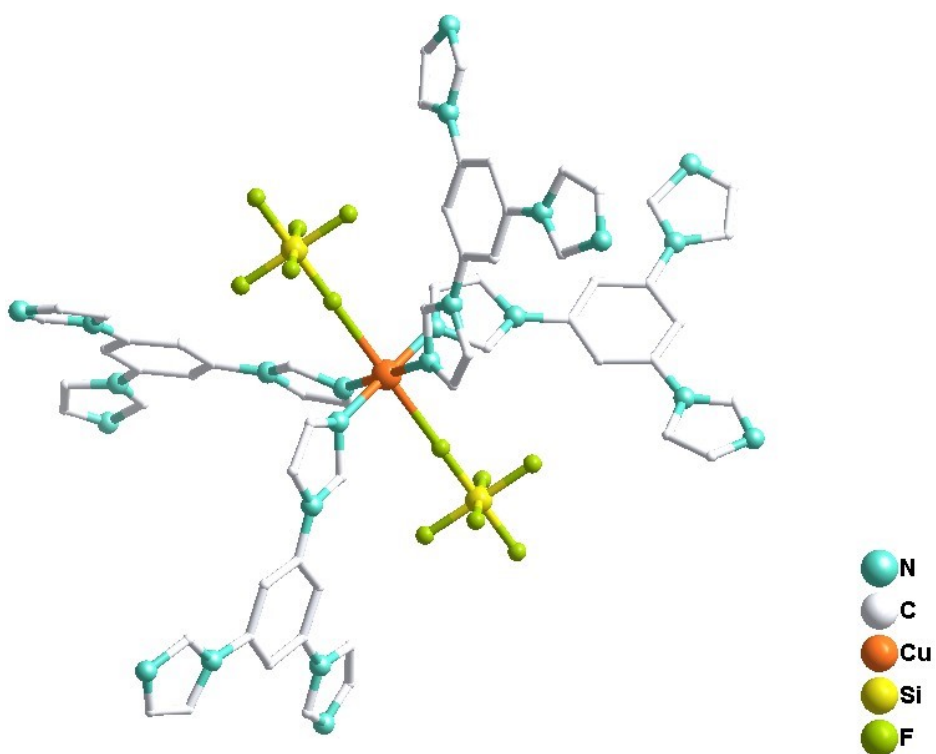

**Figure S2.** The basic coordination environment of CTGU-45.

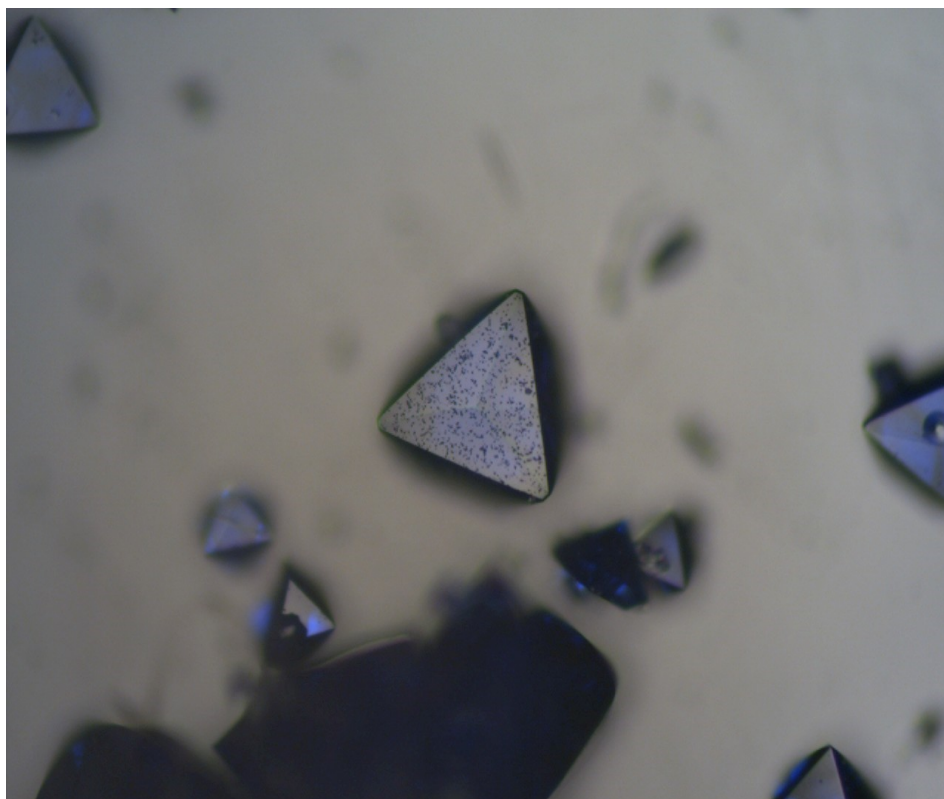

**Figure S3.** Photograph of freshly prepared CTGU-48 crystals.

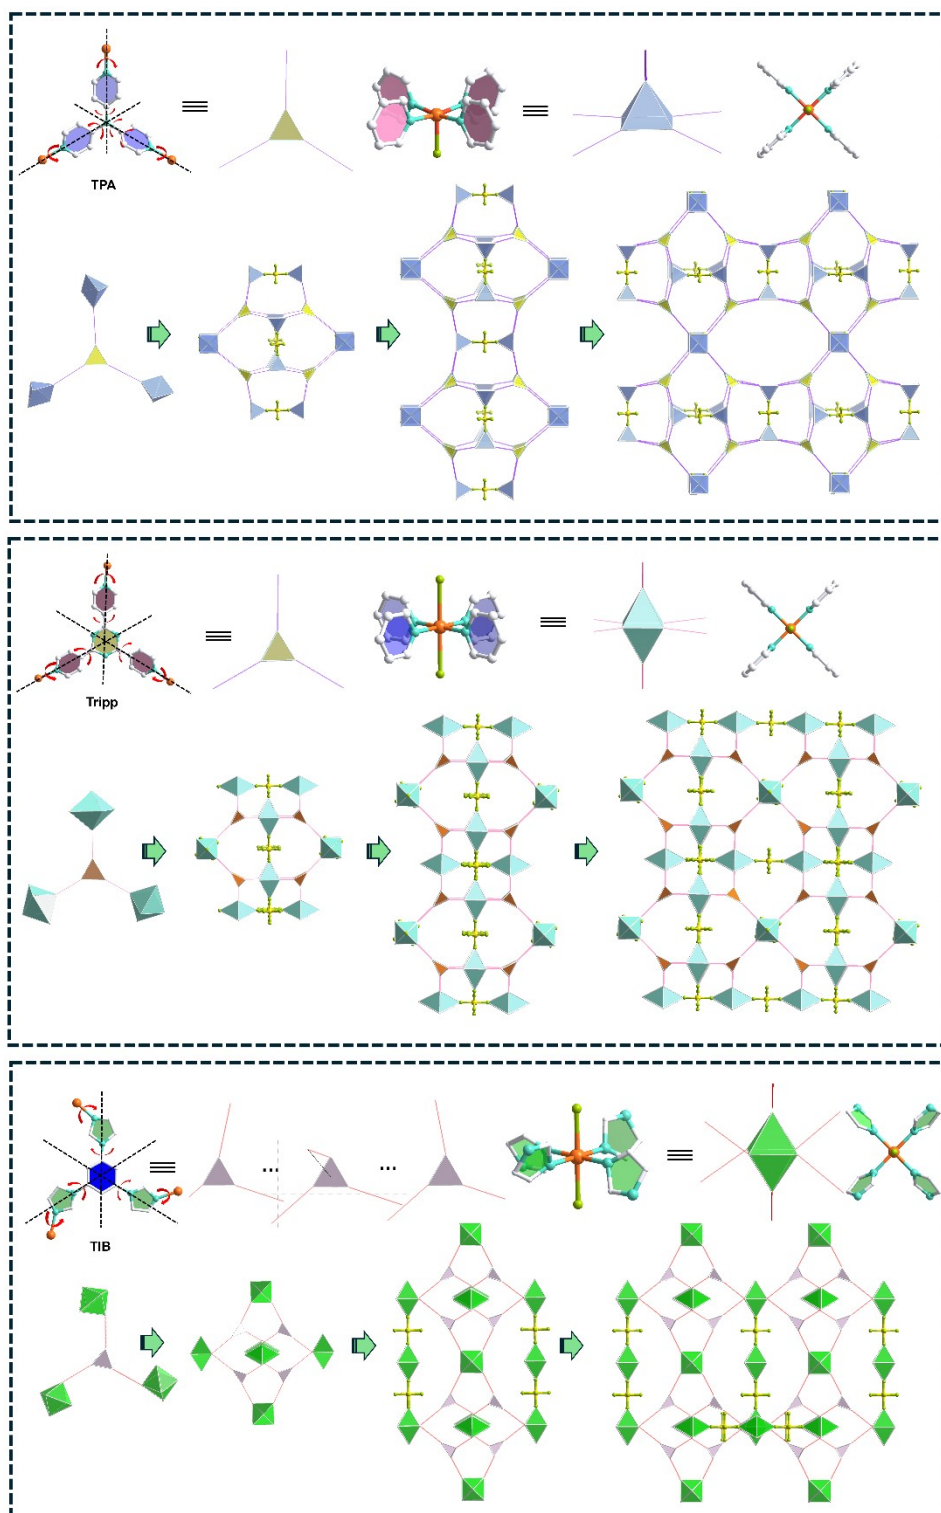

**Figure S4.** Topological evolution analysis for SIFSIX-Cu-TPA, Tripp-Cu-SIFSIX, and CTGU-45.

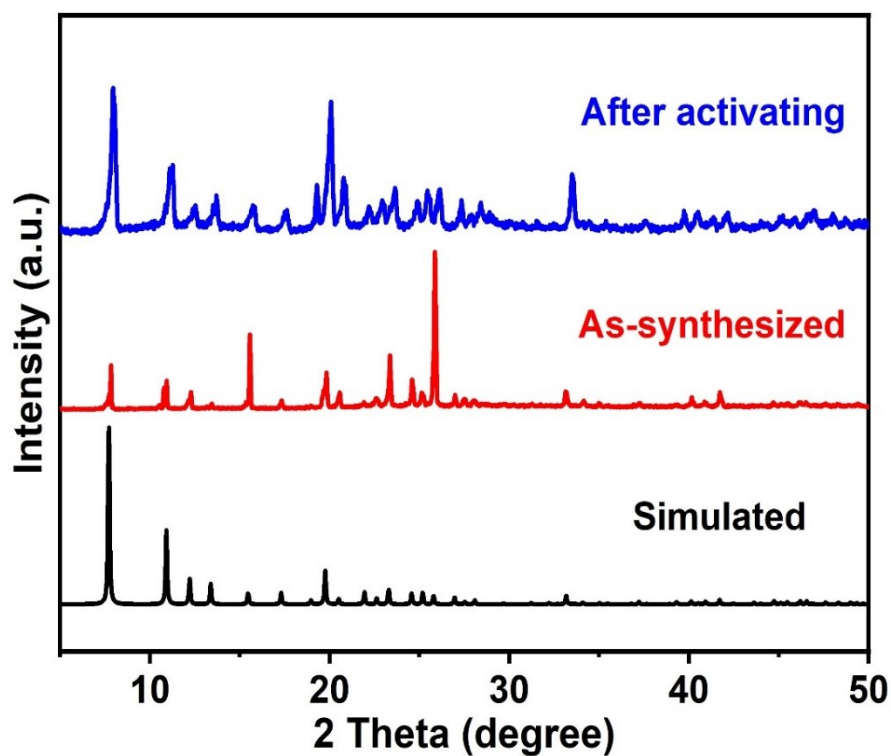

**Figure S5.** The PXR D patterns of freshly prepared/activated CTGU-45, and the simulated patterns based on SCXRD data.

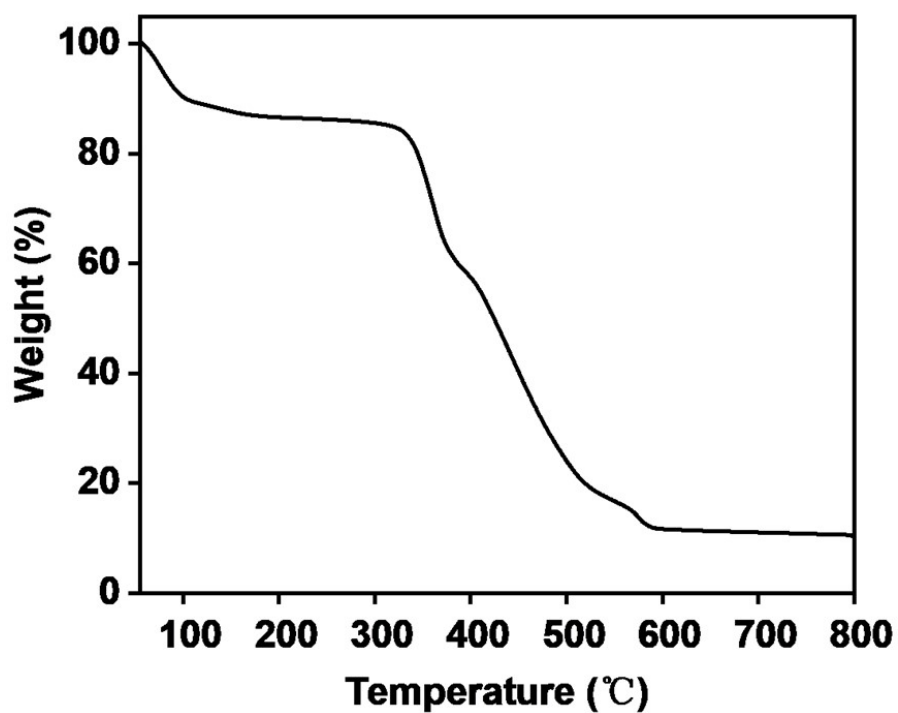

**Figure S6.** Thermogravimetric curves of CTGU-45 measured under air atmosphere.

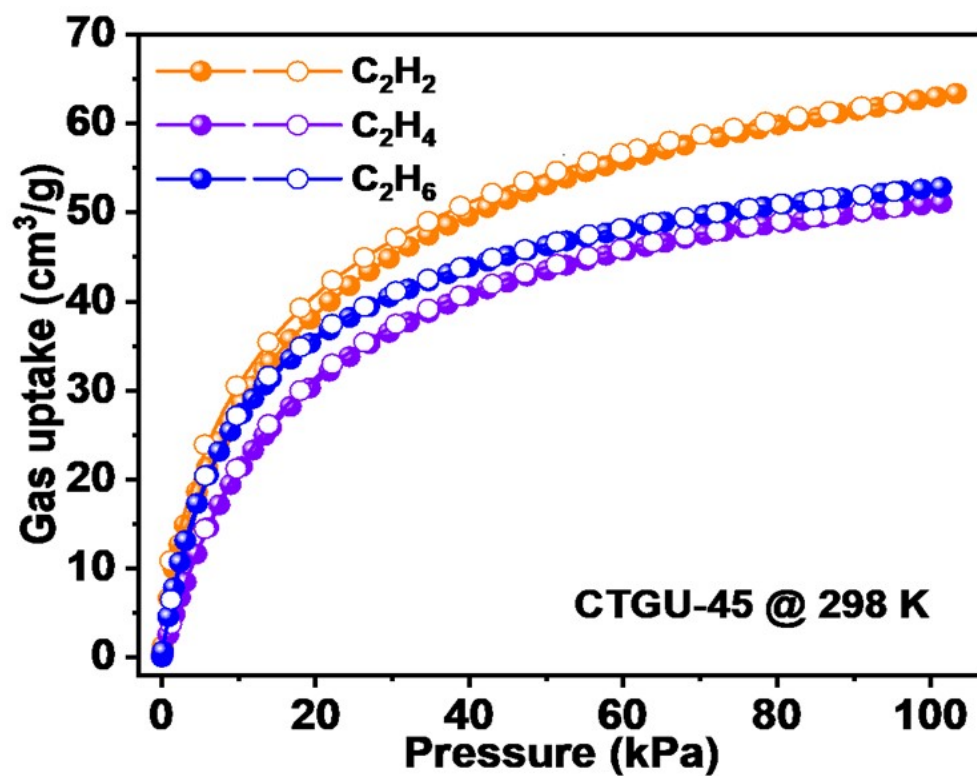

Figure S7. The adsorption isotherms of  $C_2H_2$ ,  $C_2H_4$ ,  $C_2H_6$  in CTGU-45 at 298 K.

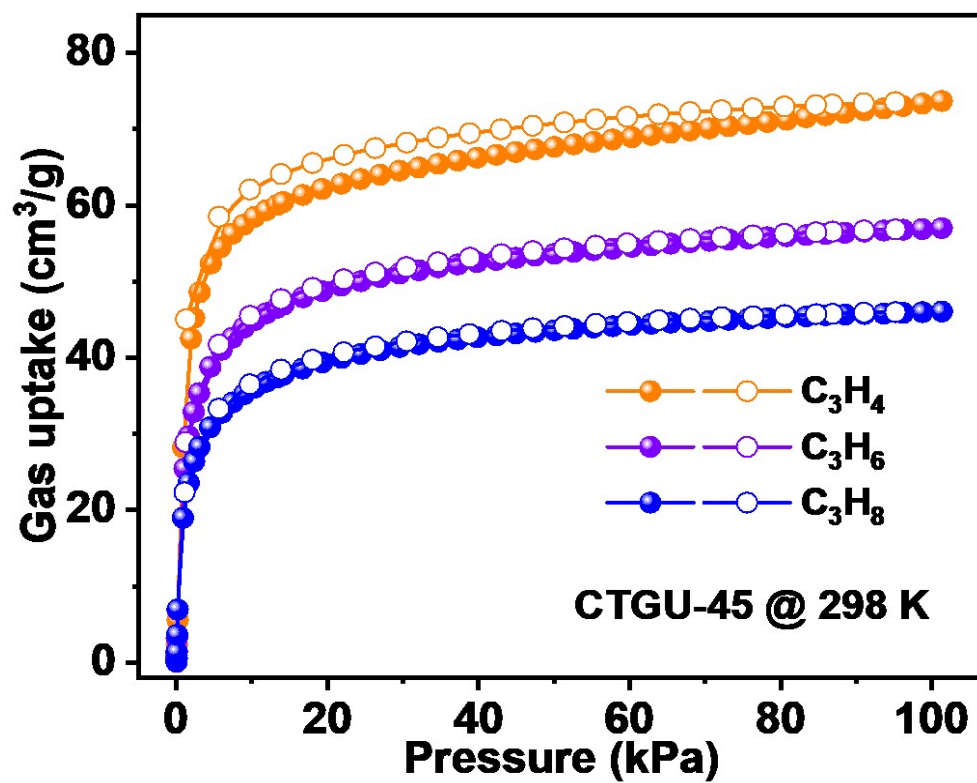

Figure S8. The adsorption isotherms of  $C_3H_4$ ,  $C_3H_6$  and  $C_3H_8$  in CTGU-45 at 298 K.

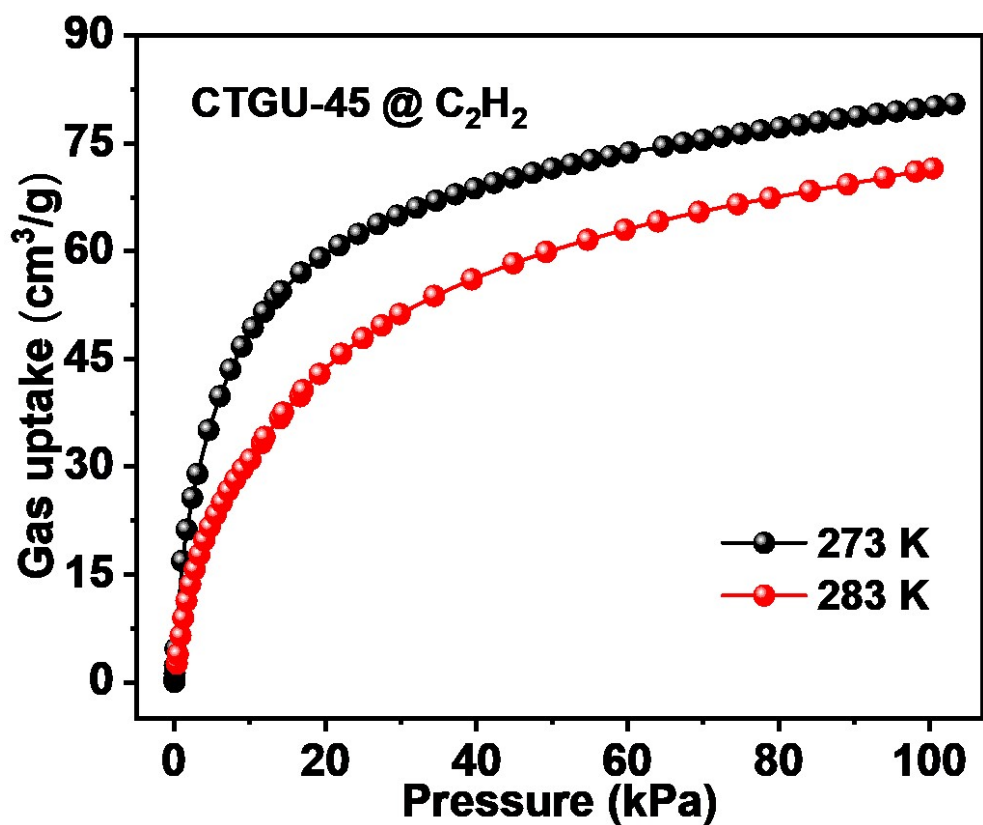

Figure S9. The adsorption isotherms of C<sub>2</sub>H<sub>2</sub> in CTGU-45 at 273 , 283 K.

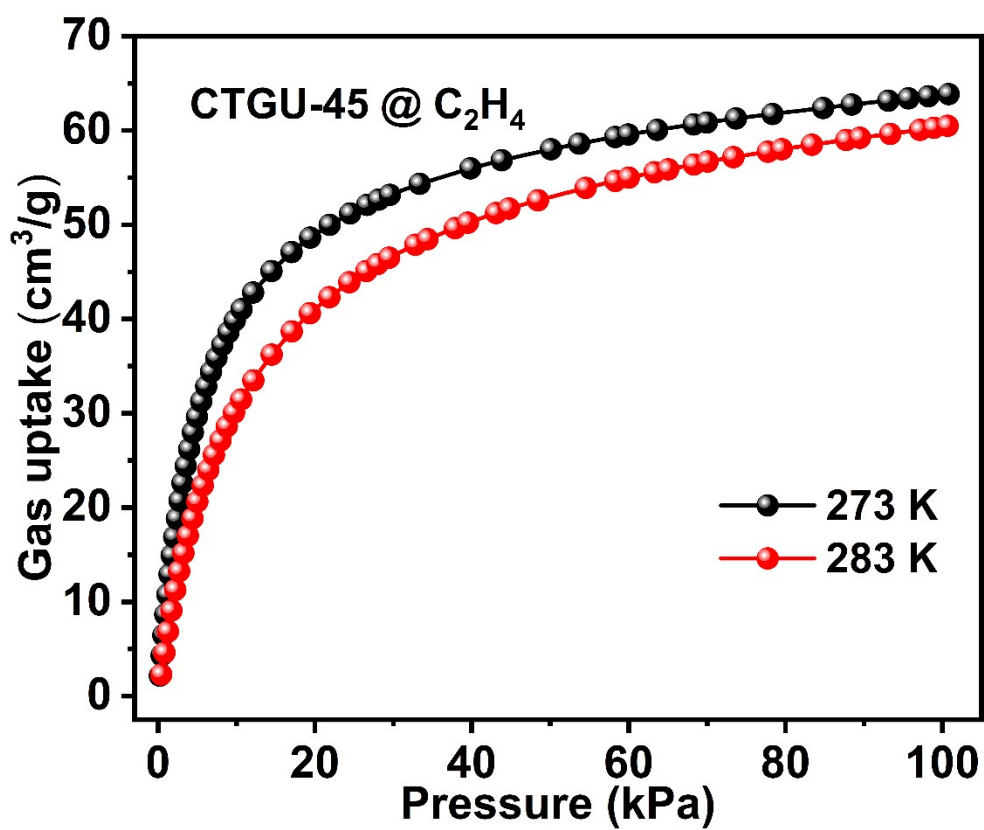

Figure S10. The adsorption isotherms of C<sub>2</sub>H<sub>4</sub> in CTGU-45 at 273 , 283 K.

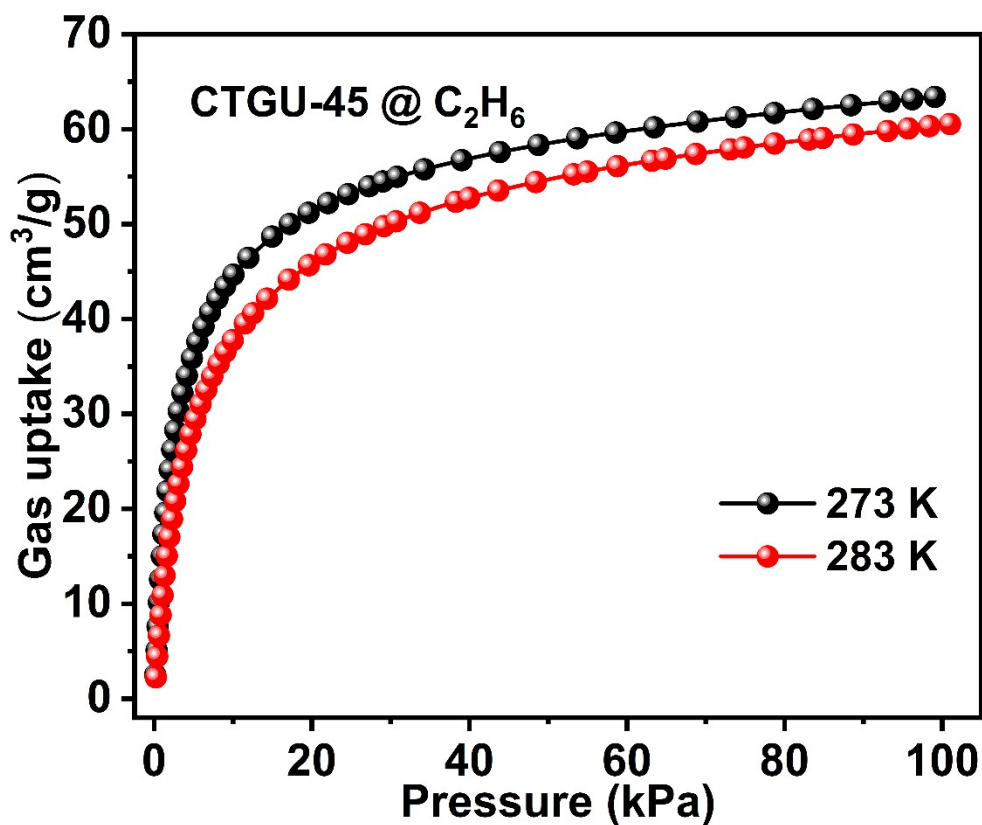

Figure S11. The adsorption isotherms of C<sub>2</sub>H<sub>6</sub> in CTGU-45 at 273 , 283 K.

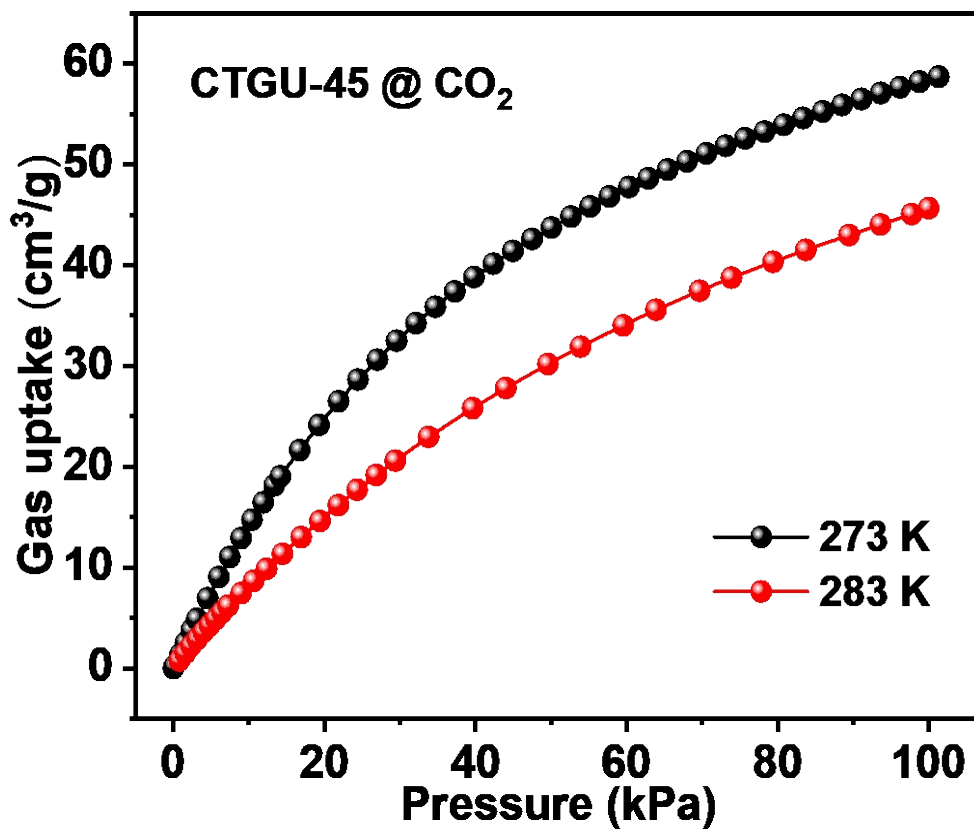

Figure S12. The adsorption isotherms of CO<sub>2</sub> in CTGU-45 at 273 , 283 K.

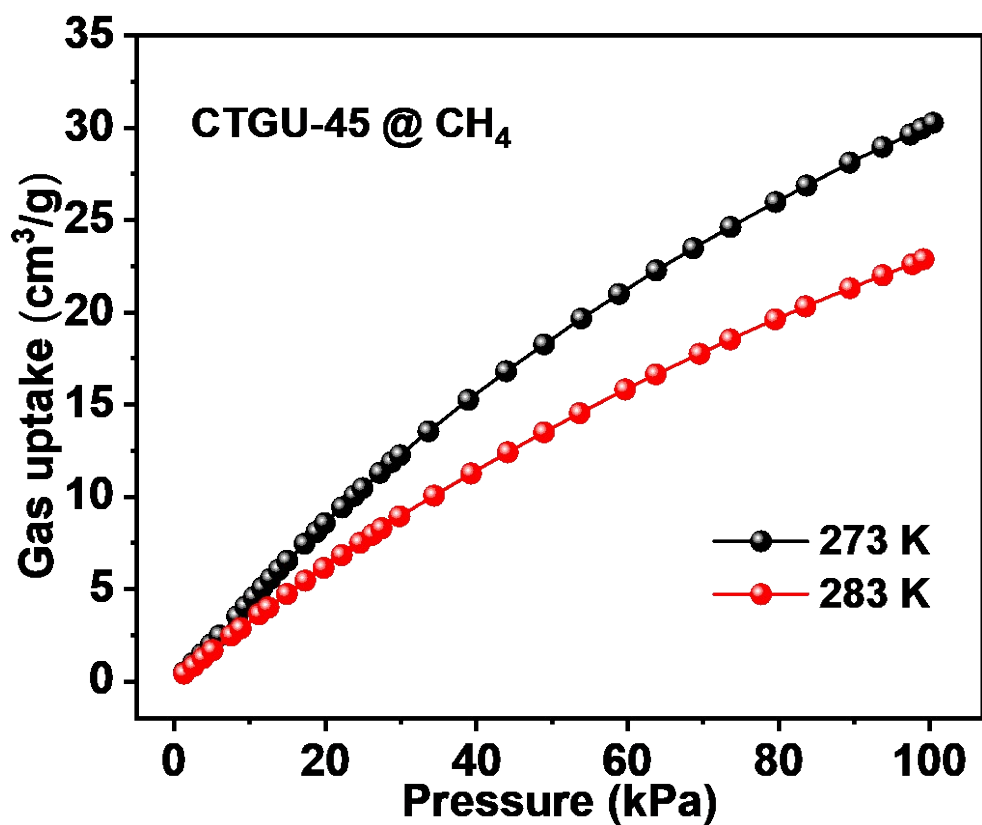

Figure S13. The adsorption isotherms of CH<sub>4</sub> in CTGU-45 at 273 , 283 K.

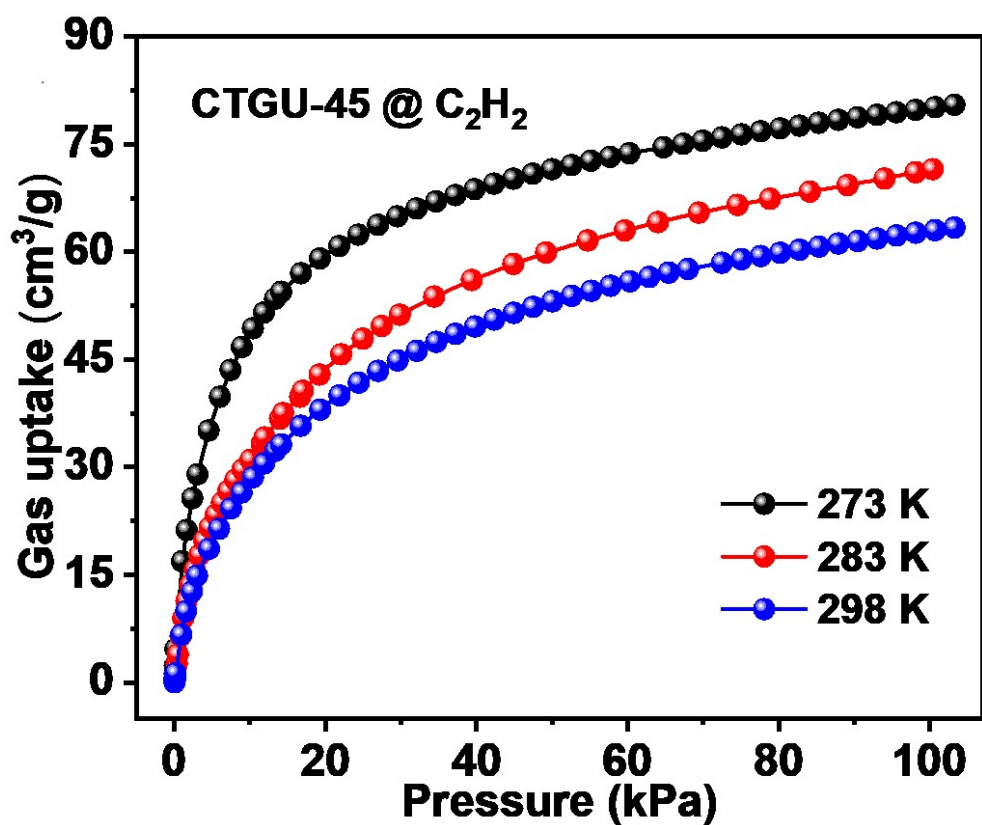

Figure S14. The adsorption isotherms of C<sub>2</sub>H<sub>2</sub> in CTGU-45 at 273 , 283, and 298 K.

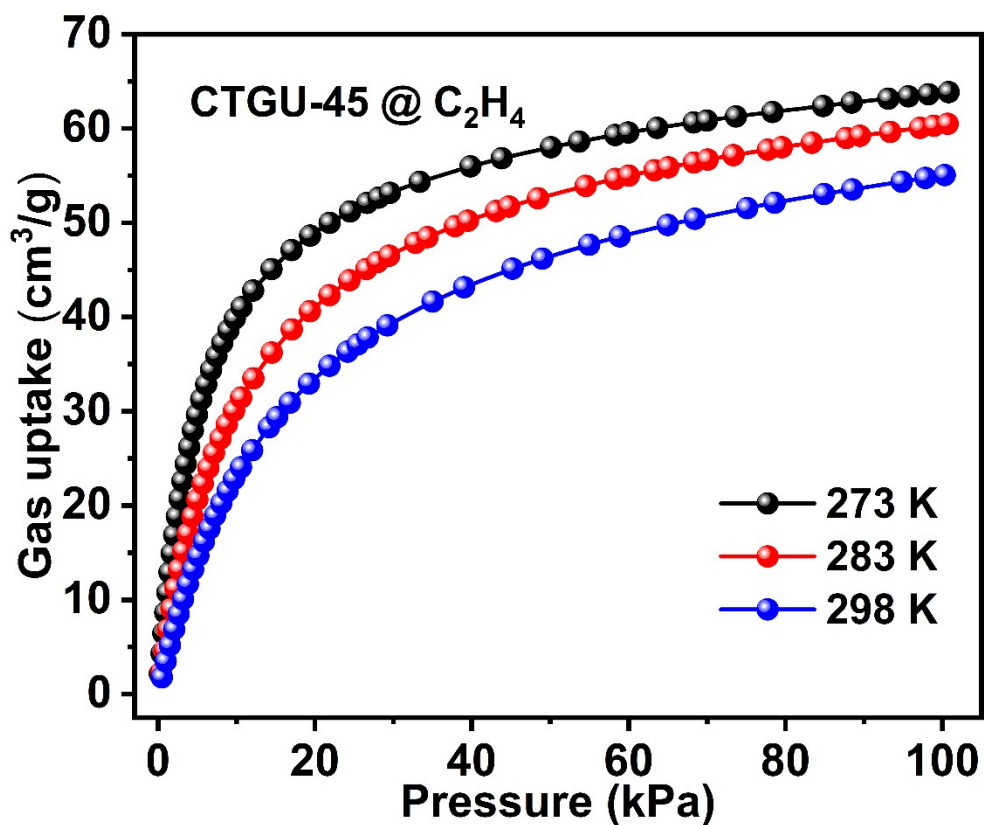

Figure S15. The adsorption isotherms of C<sub>2</sub>H<sub>4</sub> in CTGU-45 at 273 , 283, and 298 K.

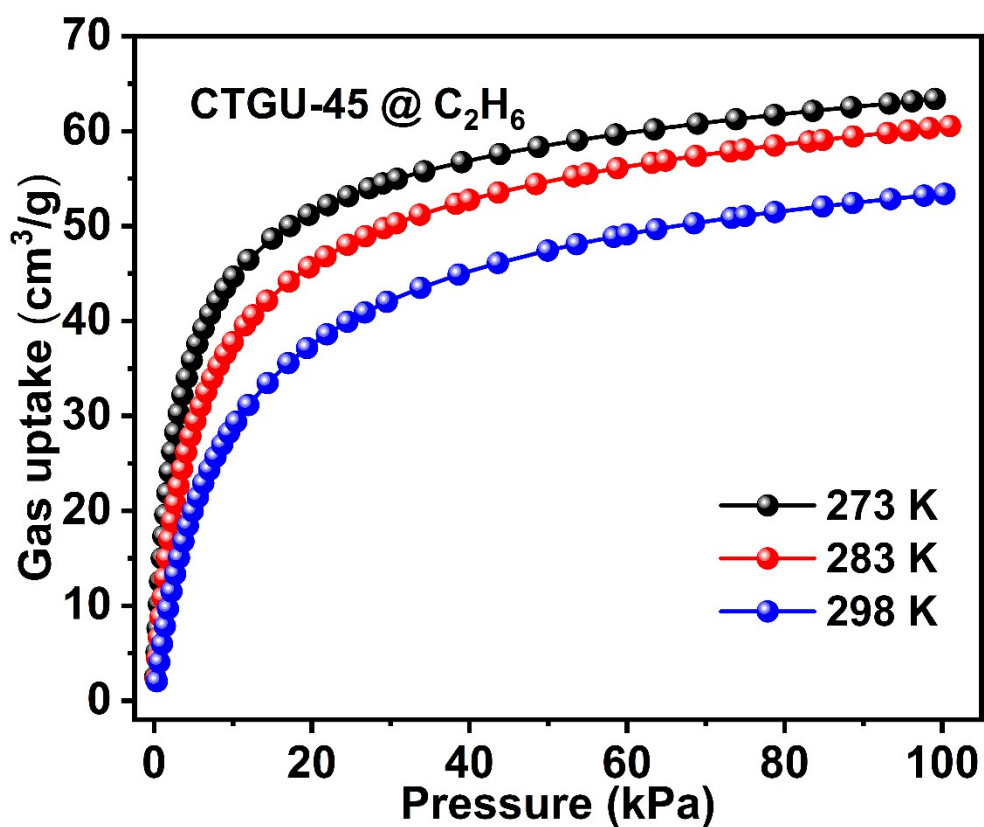

Figure S16. The adsorption isotherms of C<sub>2</sub>H<sub>6</sub> in CTGU-45 at 273 , 283, and 298 K.

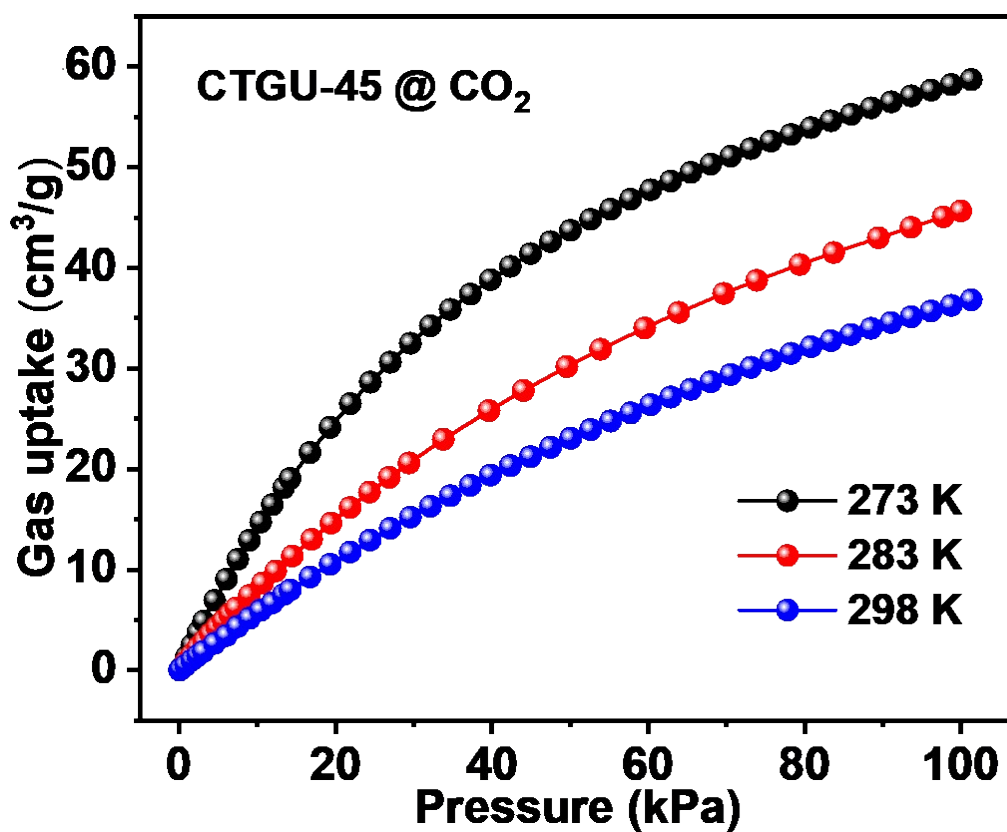

Figure S17. The adsorption isotherms of CO<sub>2</sub> in CTGU-45 at 273 , 283, and 298 K.

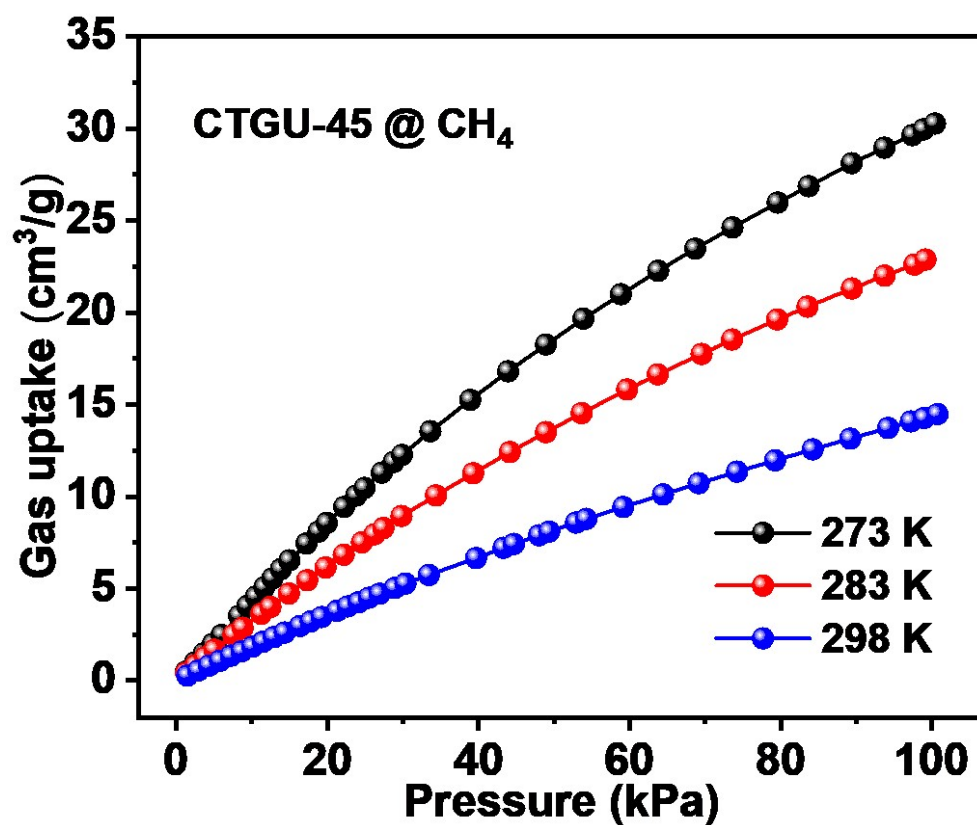

Figure S18. The adsorption isotherms of CH<sub>4</sub> in CTGU-45 at 273 , 283, and 298 K.

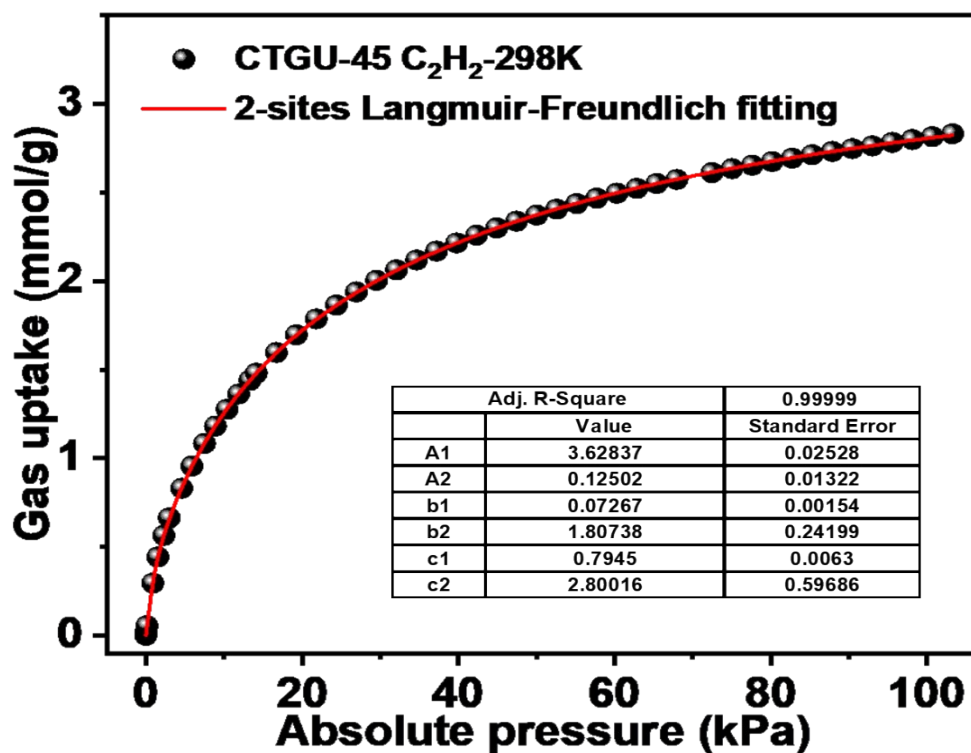

Figure S19. C<sub>2</sub>H<sub>2</sub> adsorption isotherms at 298 K in CTGU-45 with dual-sites Langmuir-Freundlich model fits.

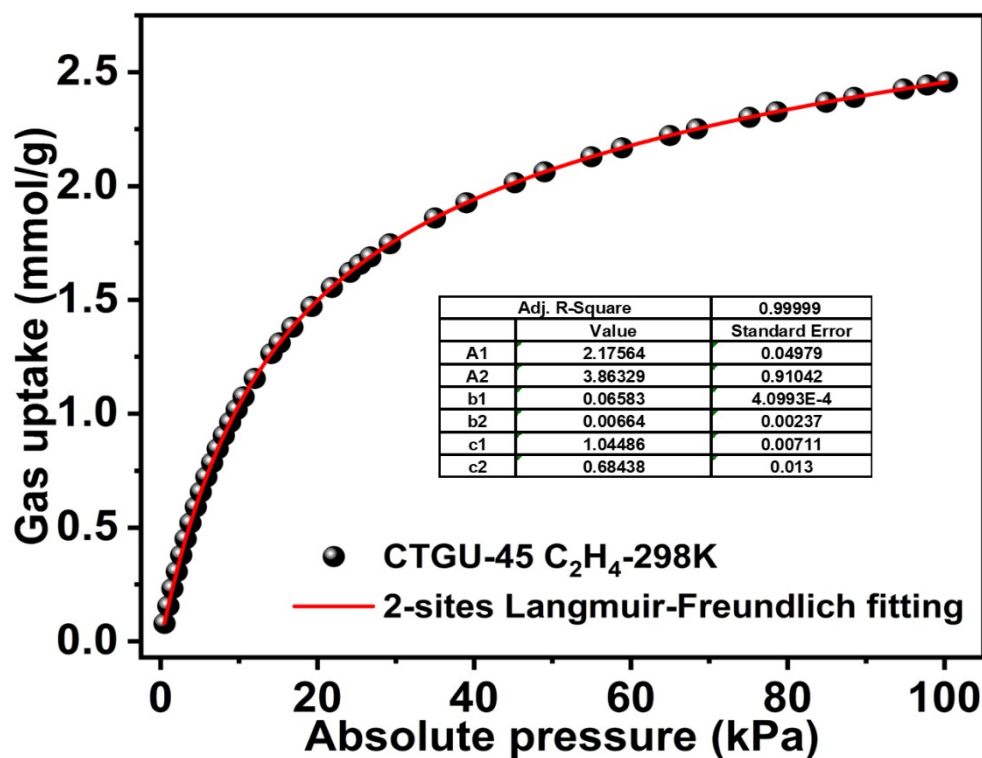

Figure S20. C<sub>2</sub>H<sub>4</sub> adsorption isotherms at 298 K in CTGU-45 with dual-sites Langmuir-Freundlich model fits.

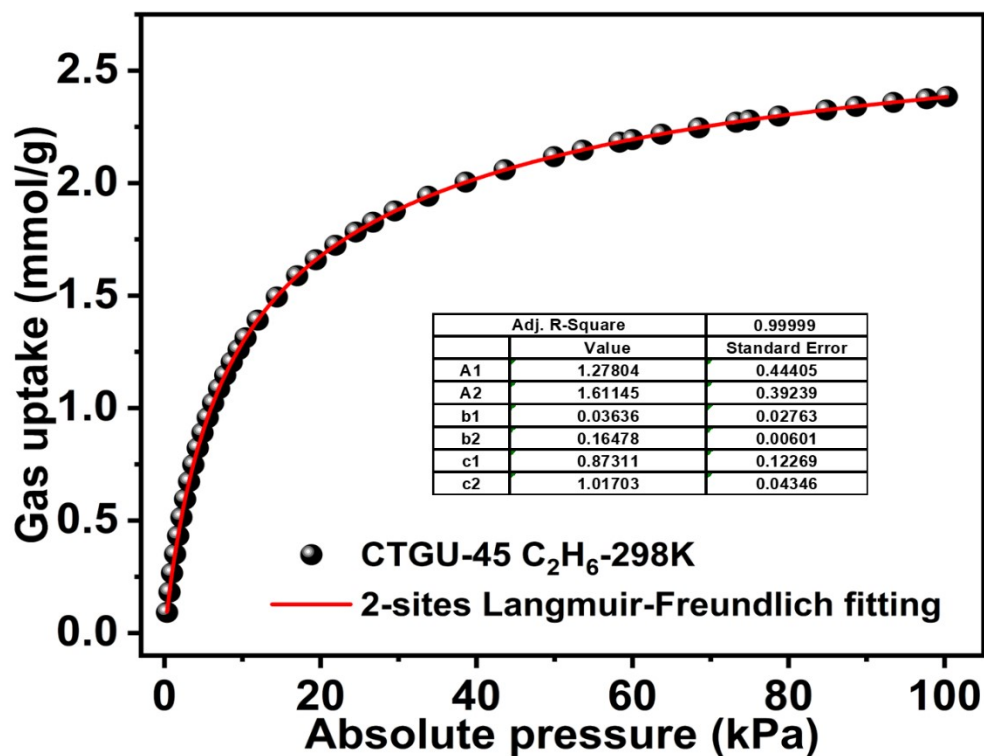

Figure S21. C<sub>2</sub>H<sub>6</sub> adsorption isotherms at 298 K in CTGU-45 with dual-sites Langmuir-Freundlich model fits.

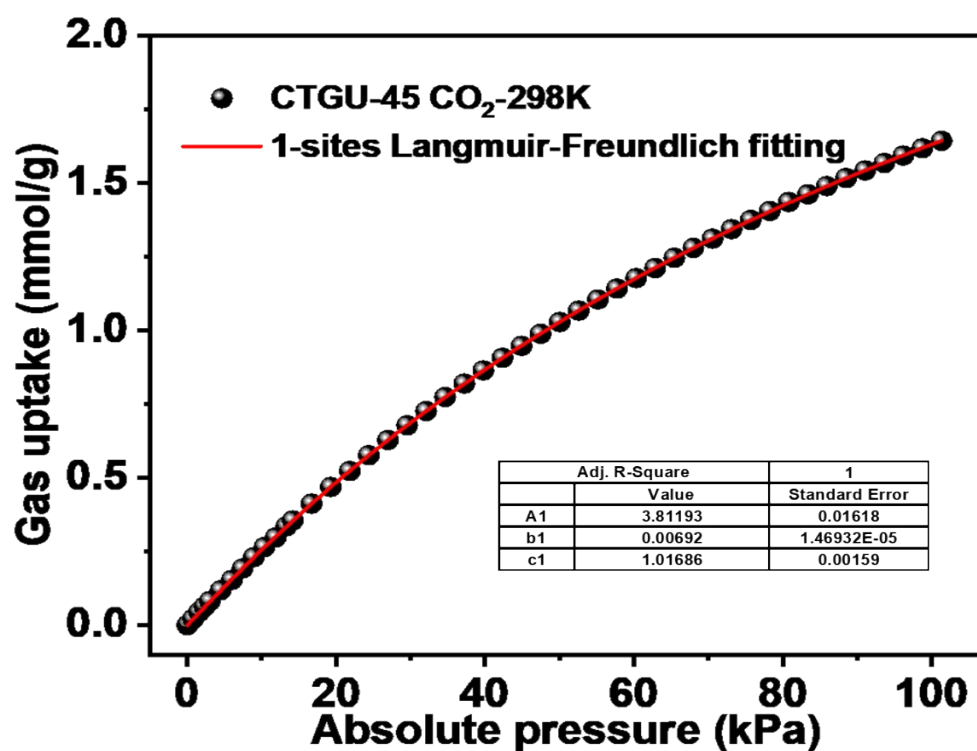

Figure S22. CO<sub>2</sub> adsorption isotherms at 298 K in CTGU-45 with single -site Langmuir-Freundlich model fits.

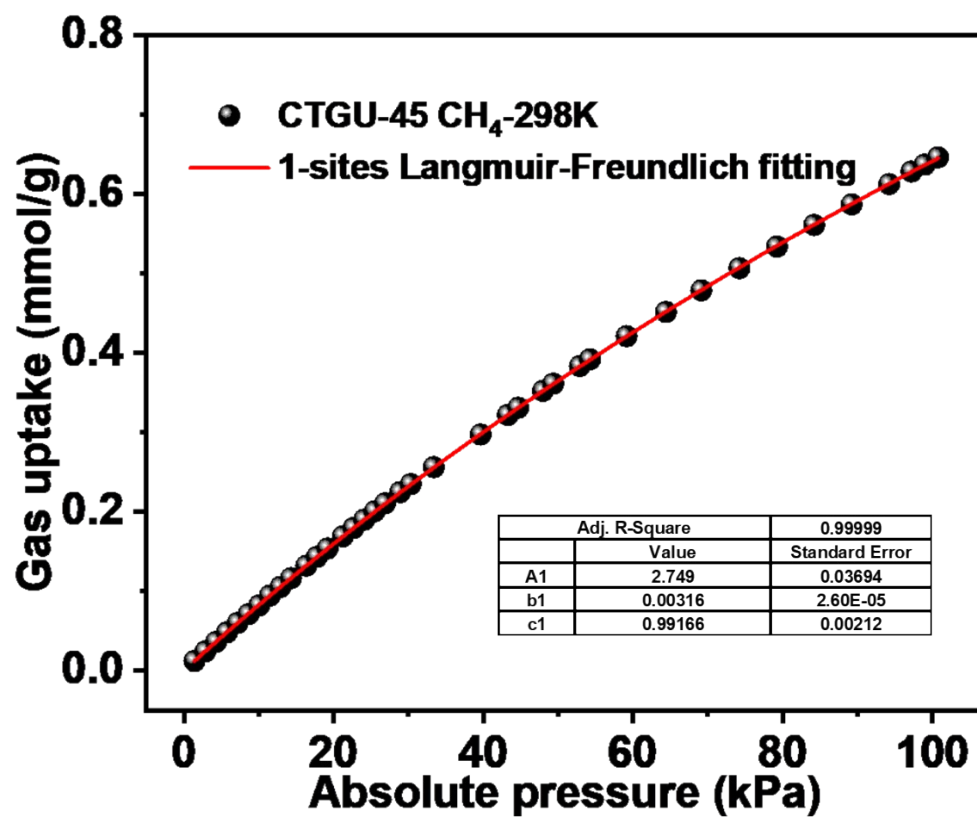

**Figure S23.** CH<sub>4</sub> adsorption isotherms at 298 K in CTGU-45 with single -site Langmuir-Freundlich model fits.

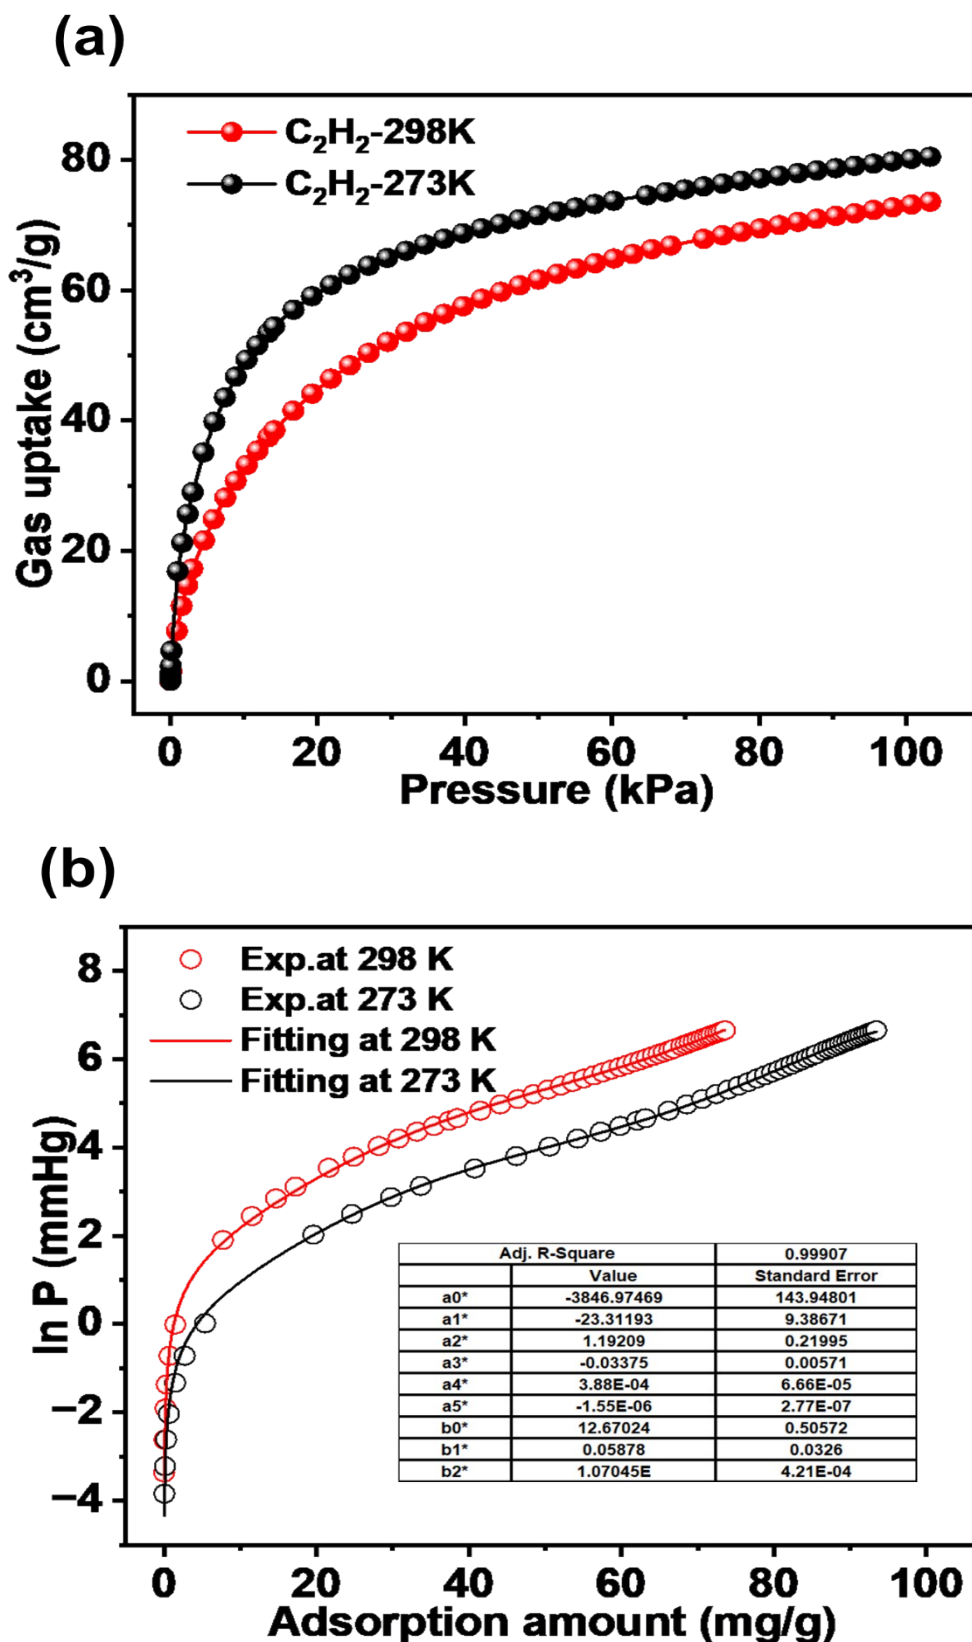

Figure S24. Virial fitting of (a)  $C_2H_2$  adsorption isotherms of CTGU-45 for  $Q_{st}$  calculation.

The fitting parameters are listed in the picture (inset). Isotheric heat of adsorption of (b)

$C_2H_2$  on CTGU-45.

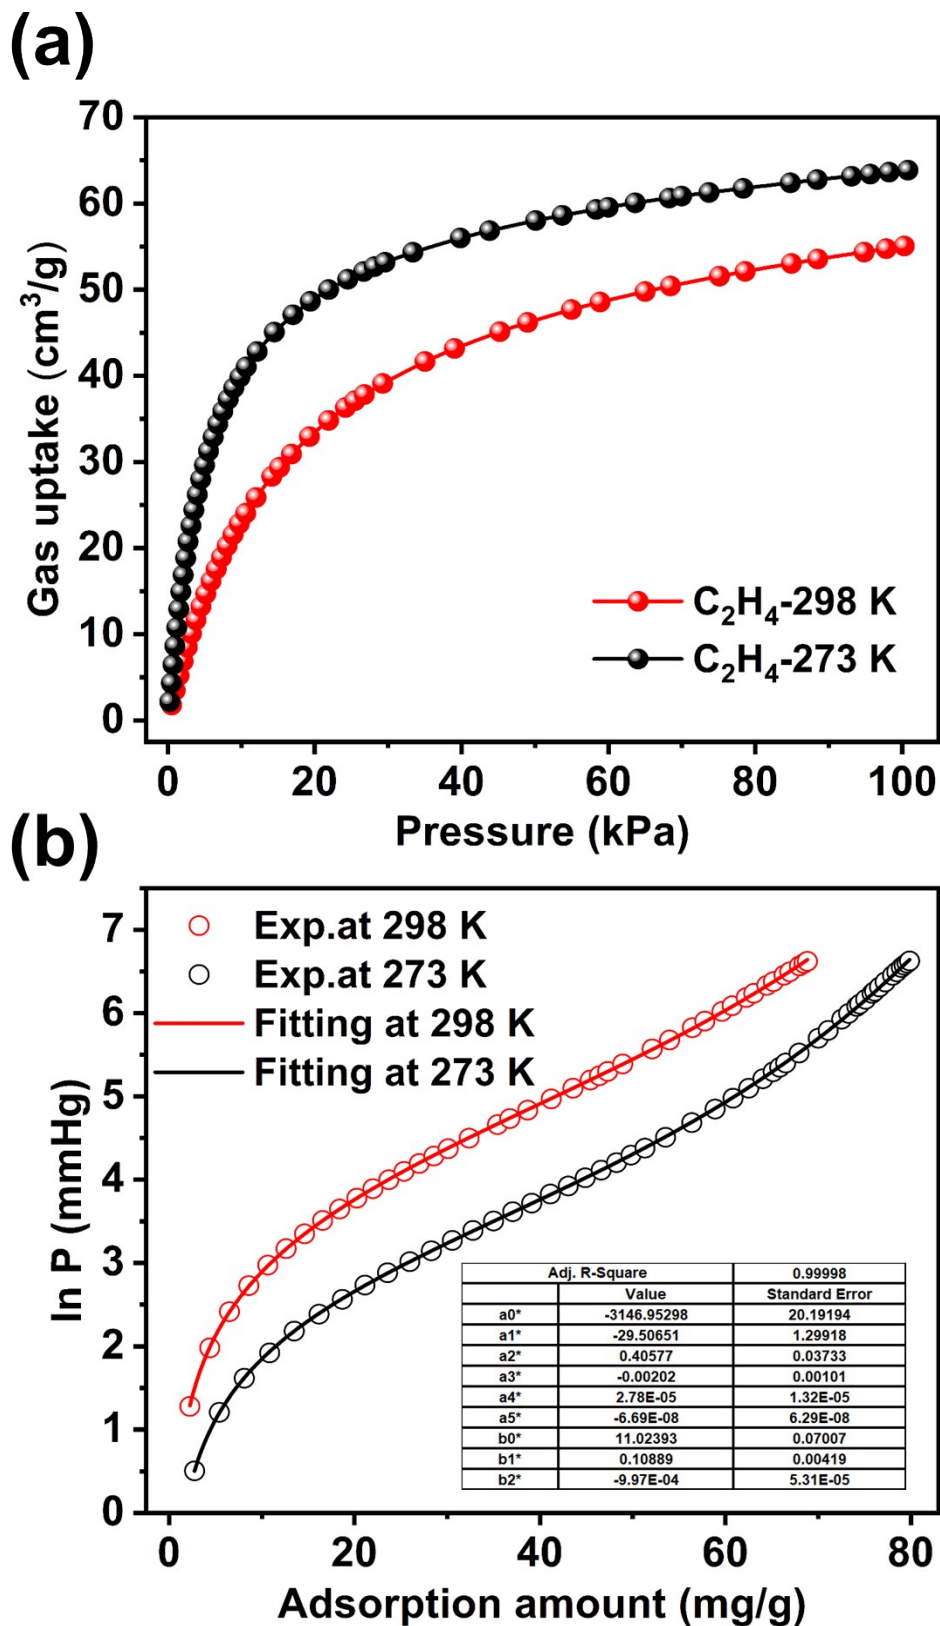

**Figure S25.** Virial fitting of (a)  $C_2H_4$  adsorption isotherms of CTGU-45 for  $Q_{st}$  calculation.

The fitting parameters are listed in the picture (inset). Isothermic heat of adsorption of (b)

$C_2H_4$  on CTGU-45.

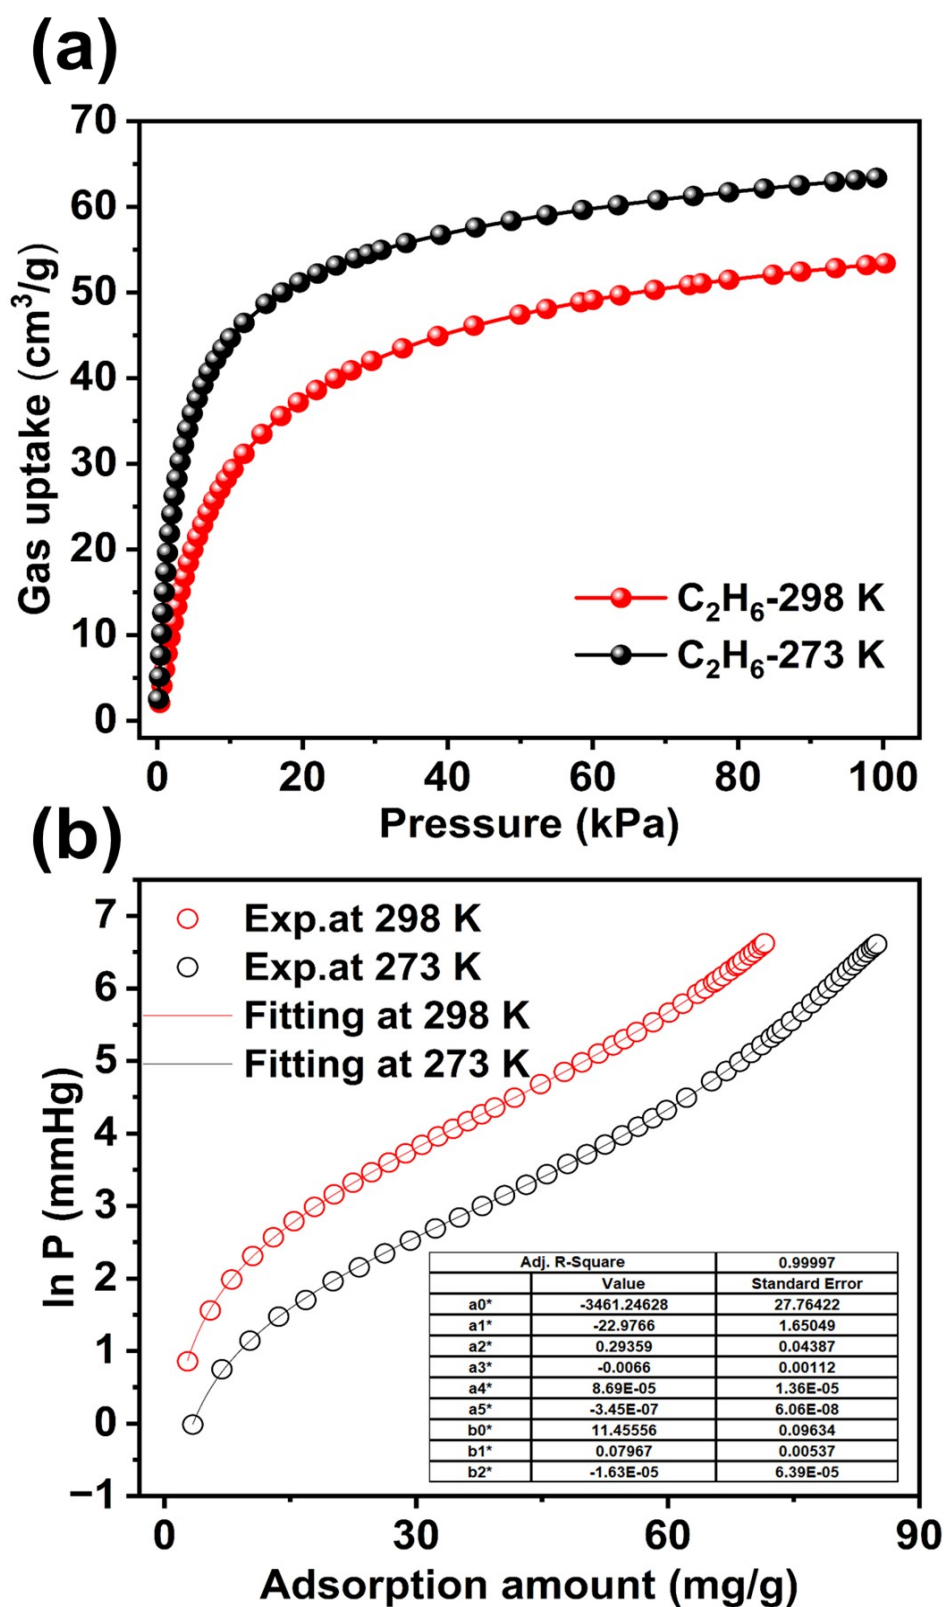

**Figure S26.** Virial fitting of (a)  $C_2H_6$  adsorption isotherms of CTGU-45 for  $Q_{st}$  calculation.

The fitting parameters are listed in the picture (inset). Isothermic heat of adsorption of (b)

$C_2H_6$  on CTGU-45.

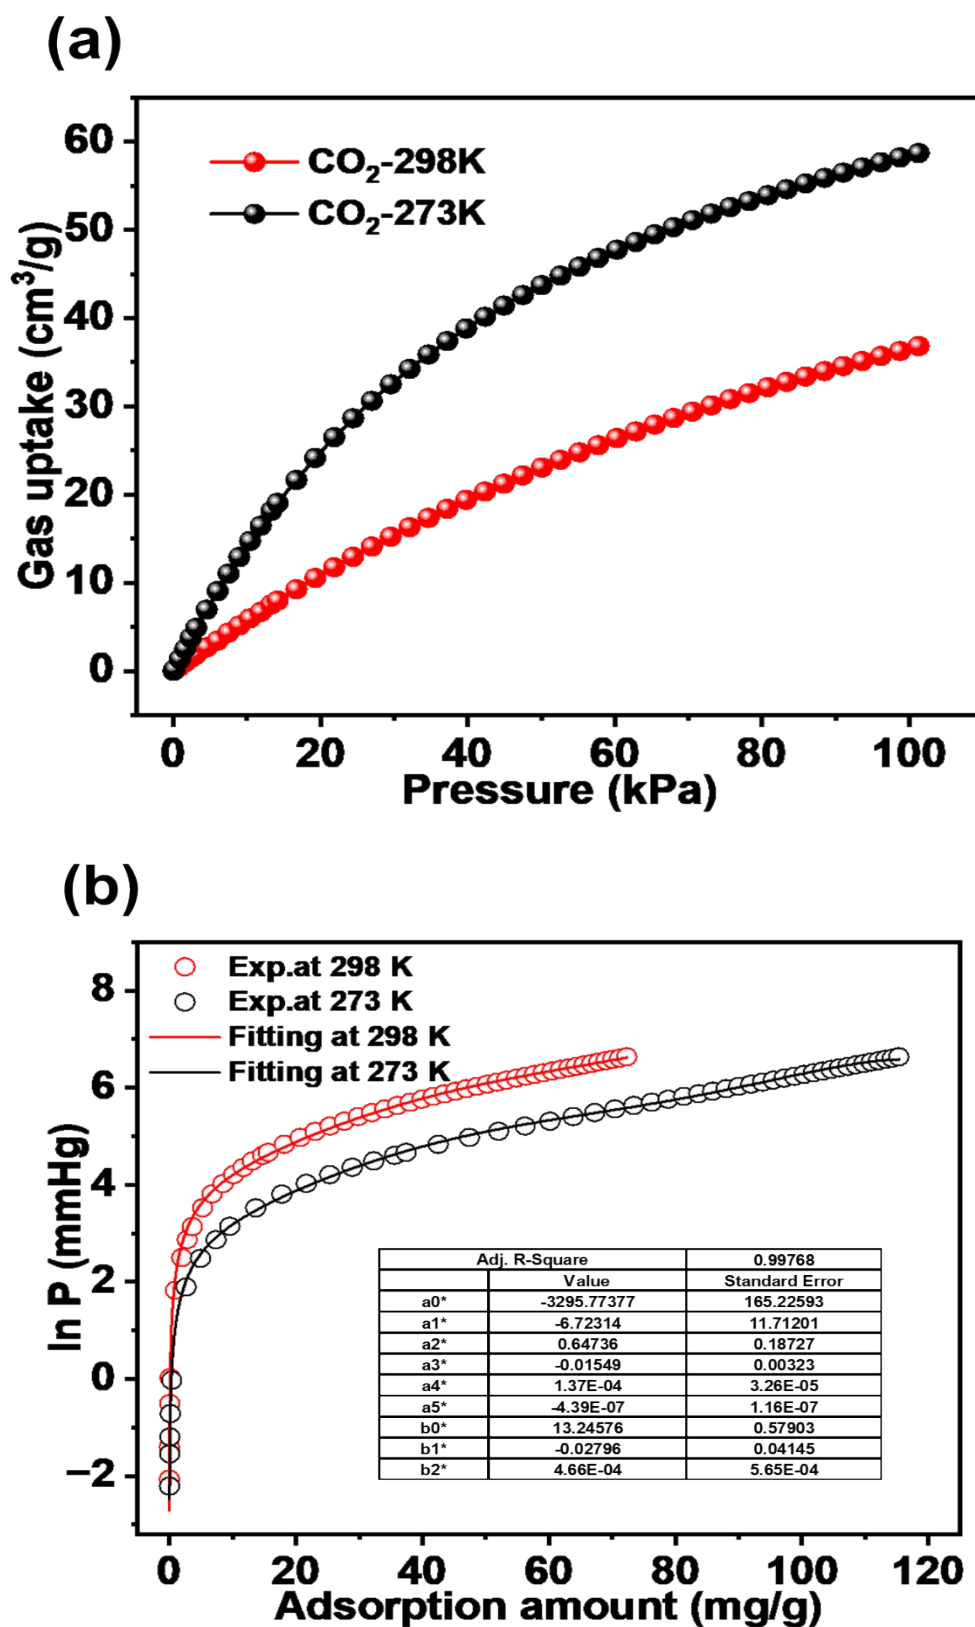

Figure S27. Virial fitting of (a) CO<sub>2</sub> adsorption isotherms of CTGU-45 for  $Q_{st}$  calculation.

The fitting parameters are listed in the picture (inset). Isothermic heat of adsorption of (b)

CO<sub>2</sub> on CTGU-45.

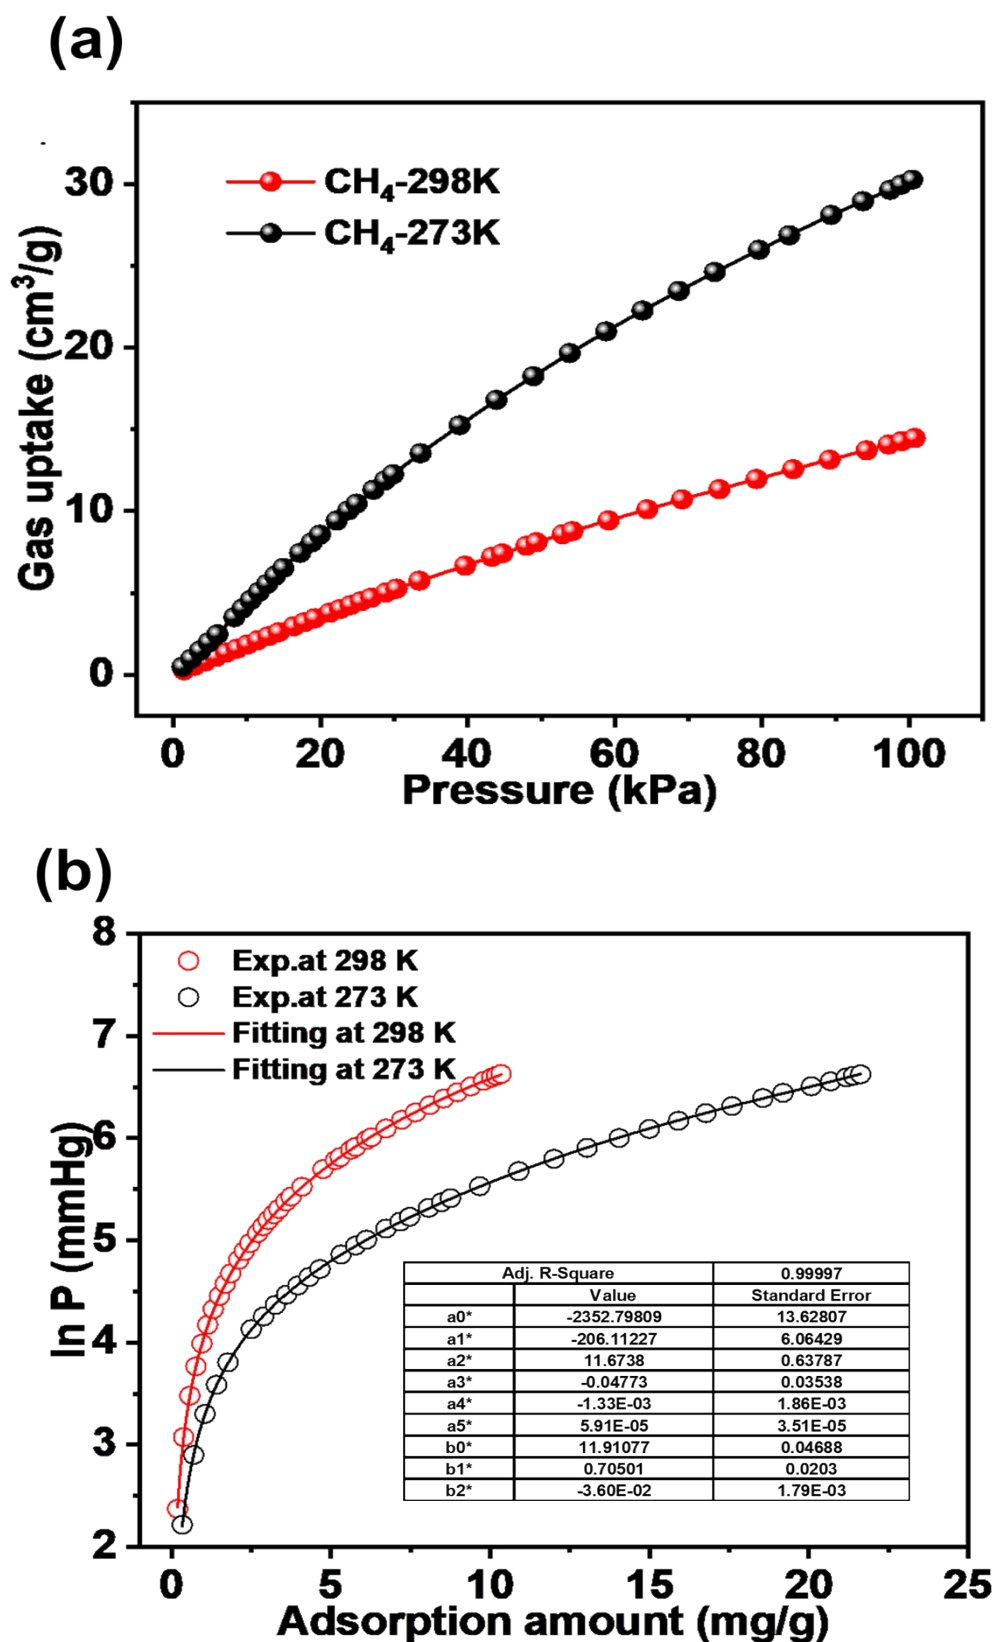

Figure S28. Virial fitting of (a) CH<sub>4</sub> adsorption isotherms of CTGU-45 for  $Q_{st}$  calculation.

The fitting parameters are listed in the picture (inset). Isotheric heat of adsorption of (b)

CH<sub>4</sub> on CTGU-45.

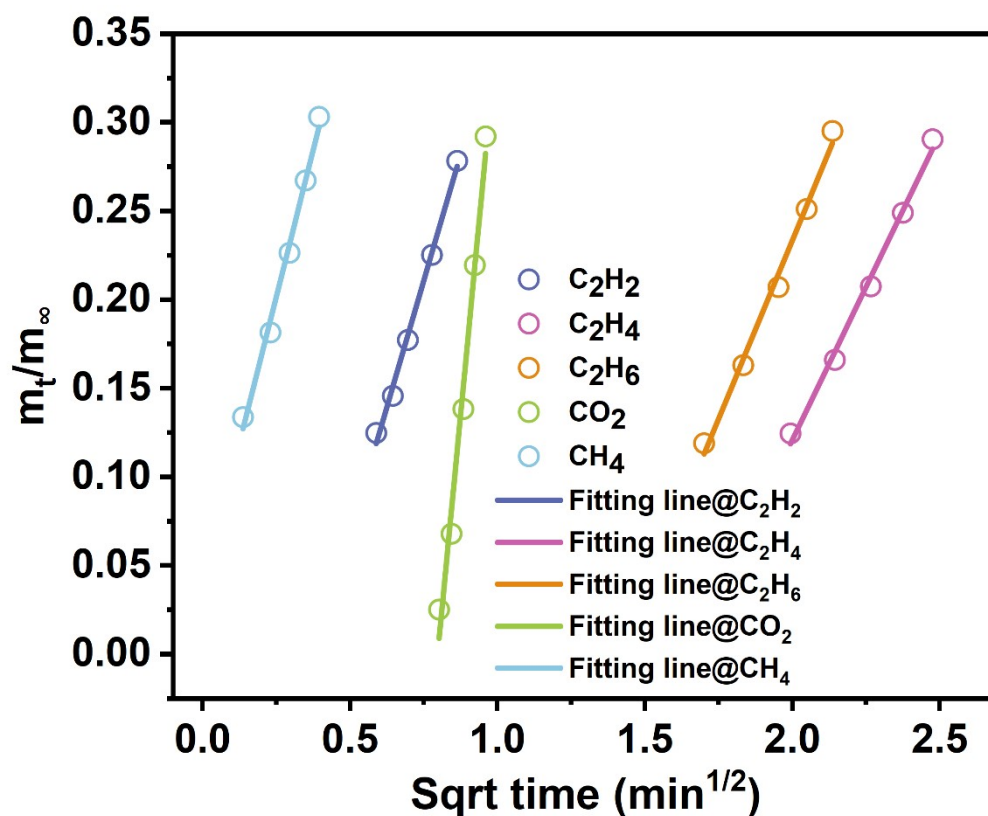

| CTGU-48                                                    | C <sub>2</sub> H <sub>2</sub> | CO <sub>2</sub> | CH <sub>4</sub> | C <sub>2</sub> H <sub>4</sub> | C <sub>2</sub> H <sub>6</sub> |
|------------------------------------------------------------|-------------------------------|-----------------|-----------------|-------------------------------|-------------------------------|
| Diffusion time constants,<br>$D_C/r_c^2$ , s <sup>-1</sup> | 0.0284                        | 0.2628          | 0.0380          | 0.0104                        | 0.0141                        |
| R <sup>2</sup>                                             | 0.9929                        | 0.9798          | 0.9886          | 0.9933                        | 0.9920                        |

**Figure S29.** The fitting of diffusion time constants based on the profiles of C<sub>2</sub>H<sub>2</sub>, C<sub>2</sub>H<sub>4</sub>, C<sub>2</sub>H<sub>6</sub>, CO<sub>2</sub>, and CH<sub>4</sub> for CTGU-48, and the calculated diffusion time constants and R<sup>2</sup>.

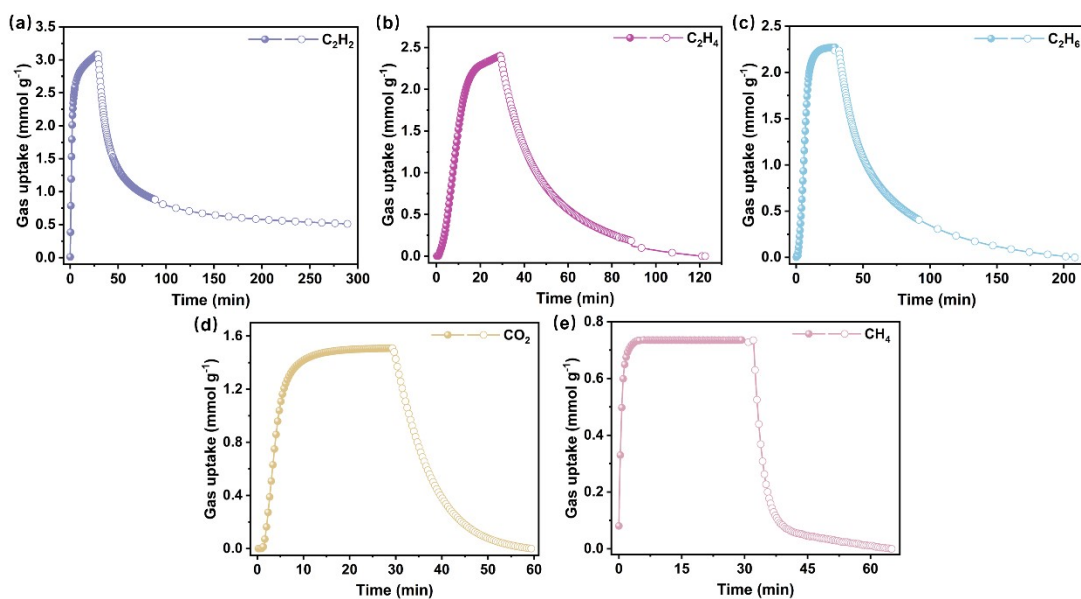

**Figure S30.** Adsorption/desorption kinetics profiles of CTGU-45 for  $C_2H_2$ ,  $C_2H_4$ ,  $C_2H_6$ ,  $CO_2$ , and  $CH_4$ .

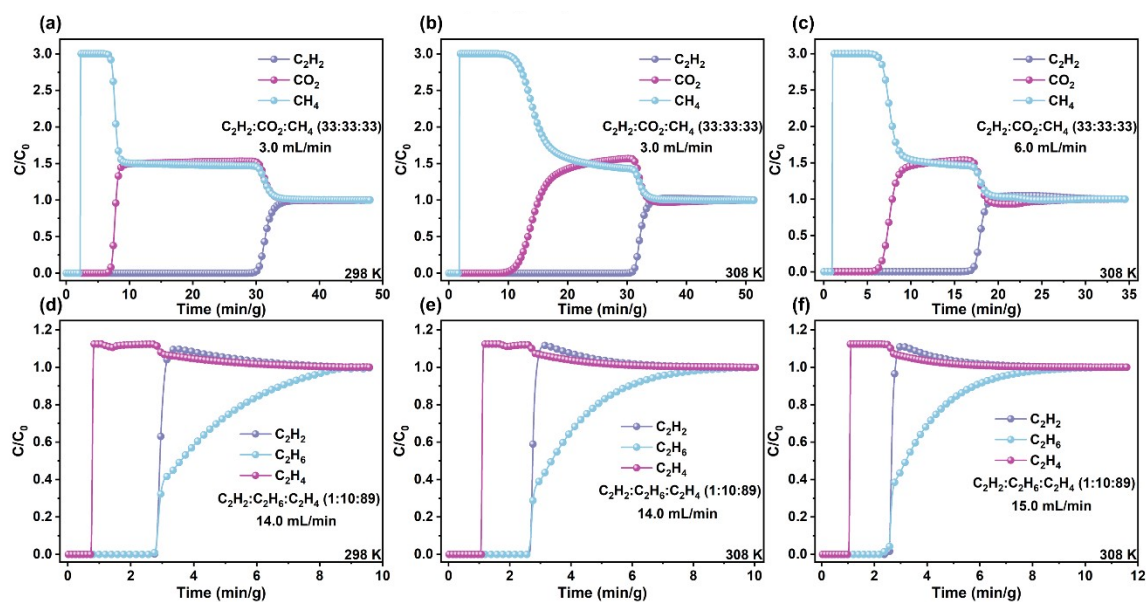

**Figure S31.** Experimental column breakthrough curves for (a-c)  $C_2H_2/CO_2/CH_4$  (33/33/33, v/v/v) and (d-f)  $C_2H_2/C_2H_6/C_2H_4$  (1/10/89, v/v/v) on CTGU-45 at 298 and 308 K with different total flow rates.

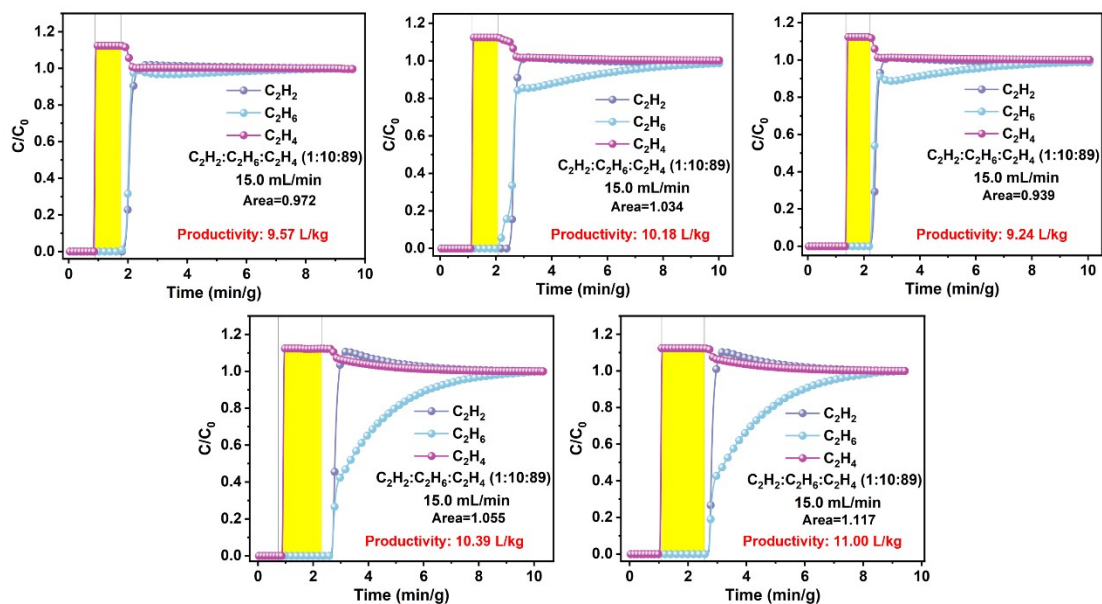

**Figure S32.** Breakthrough cycling test of CTGU-45 for  $C_2H_2/C_2H_6/C_2H_4$  (1:10:89) at 298 K under a total flow rate of 15 mL min<sup>-1</sup>.

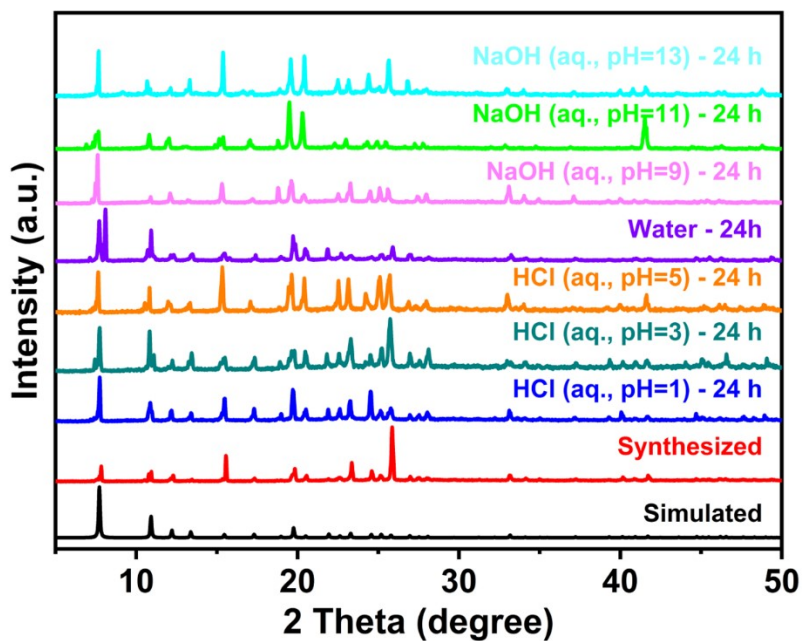

**Figure S33.** PXRD patterns of CTGU-45 after treatment with acidic or alkaline aqueous solution.

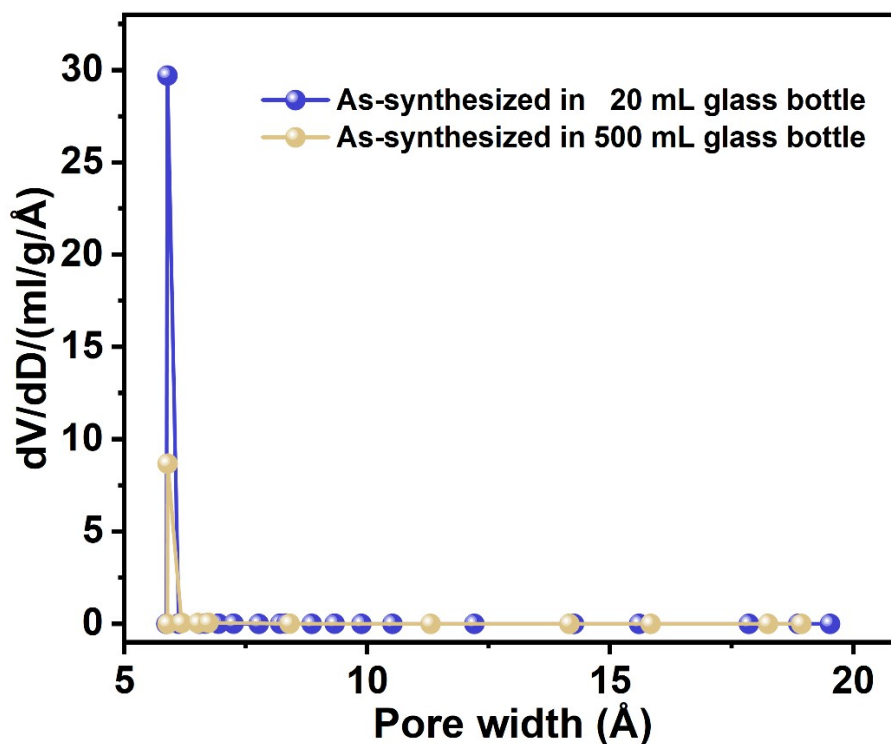

**Figure S34.** Pore size distributions of the CTGU-45 samples prepared at 500-mL and 20-mL scales obtained from the N<sub>2</sub> ads/desorption data (77 K).

**Table S2.** Comparison of the Anion-Pillared MOFs on C<sub>2</sub>H<sub>2</sub> and CO<sub>2</sub> adsorption capacity, IAST selectivity of C<sub>2</sub>H<sub>2</sub>/CO<sub>2</sub>, and adsorption enthalpy (Q<sub>st</sub>).

| Porous Materials  | C <sub>2</sub> H <sub>2</sub> uptake (cm <sup>3</sup> /g) | CO <sub>2</sub> uptake (cm <sup>3</sup> /g) | IAST selectivity (50:50) | Q <sub>st</sub> (C <sub>2</sub> H <sub>2</sub> ) (kJ/mol) | Q <sub>st</sub> (CO <sub>2</sub> ) (kJ/mol) | Refs             |
|-------------------|-----------------------------------------------------------|---------------------------------------------|--------------------------|-----------------------------------------------------------|---------------------------------------------|------------------|
| <b>CTGU-45</b>    | <b>63.38</b>                                              | <b>36.81</b>                                | <b>5.66</b>              | <b>31.99</b>                                              | <b>27.40</b>                                | <b>This work</b> |
| SIFSIX-Cu-TPA     | 185.20                                                    | 107.30                                      | 5.3                      | 39.1                                                      | 25.7                                        | 10               |
| QDU-MOF-1         | 141.03                                                    | 127.76                                      | 2.95                     | 72.52                                                     | 39.89                                       | 11               |
| MPM-1-TIFSIX      | 101.47                                                    | 86.91                                       | 0.83                     | 30.1                                                      | 48.4                                        | 12               |
| TIFSIX-17-Ni      | 73.92                                                     | 49.28                                       | 21                       | 48.3                                                      | 37.8                                        | 13               |
| NBOFFIVE-dps-Cu   | 36.96                                                     | 24.64                                       | 9                        | 53.6                                                      | /                                           | 14               |
| sql-SIFSIX-bpe-Zn | 40                                                        | /                                           | 8.4                      | 67.5                                                      | 33.6                                        | 15               |
| SIFSIX-DPA-Cu-i   | 75.59                                                     | 22.5                                        | 9.34                     | 46.53                                                     | 26.36                                       | 16               |
| SIFSIX-17-Ni      | 73.92                                                     | 51.52                                       | 11.7                     | 44.2                                                      | 40.2                                        | 13               |
| SIFSIX-pyz-SH-Ni  | 75.94                                                     | 49.95                                       | 10                       | 41.5                                                      | 35.5                                        | 17               |
| DICRO-4-Ni-I      | 43.01                                                     | 23.07                                       | 14                       | 37.7                                                      | 33.9                                        | 18               |

|               |        |       |       |       |       |    |
|---------------|--------|-------|-------|-------|-------|----|
| TIFSIX-2-Cu-I | 91.84  | 96.32 | 6.5   | 46.3  | 35.8  | 19 |
| ZNU-8         | 113.12 | 49.73 | 3.74  | 27.2  | 23.4  | 20 |
| ZNU-9         | 117.86 | 96.77 | 10.3  | 33.1  | 26.6  | 20 |
| ZNU-12        | 176.52 | 96.98 | 13.35 | 36.08 | 31.89 | 21 |
| ZNU-15        | 36.0   | 13.5  | 10.5  | 54.0  | 42.8  | 22 |
| BSF-2         | 41.44  | 29.79 | 5.1   | 37.3  | 28.7  | 23 |
| BSF-4         | 53.31  | 35.84 | 9.8   | 35    | 24.5  | 24 |
| NBOFFIVE-3-Ni | 85.12  | 42.56 | 6     | 36.7  | 25.0  | 25 |

**Table S3.** Summary of adsorption performance for one-step C<sub>2</sub>H<sub>4</sub> purification materials at 298 K.

| Porous Materials | C <sub>2</sub> H <sub>2</sub> uptake (mmol/g) | C <sub>2</sub> H <sub>4</sub> uptake (mmol/g) | C <sub>2</sub> H <sub>6</sub> uptake (mmol/g) | IAST selectivity (50:50) | Q <sub>st</sub> (C <sub>2</sub> H <sub>2</sub> ) (kJ/mol) | Q <sub>st</sub> (C <sub>2</sub> H <sub>4</sub> ) (kJ/mol) | Q <sub>st</sub> (C <sub>2</sub> H <sub>6</sub> ) (kJ/mol) | Ref.  |
|------------------|-----------------------------------------------|-----------------------------------------------|-----------------------------------------------|--------------------------|-----------------------------------------------------------|-----------------------------------------------------------|-----------------------------------------------------------|-------|
| <b>CTGU-45</b>   | <b>2.83</b>                                   | <b>2.46</b>                                   | <b>2.38</b>                                   | <b>5.66</b>              | <b>31.99</b>                                              | <b>25.80</b>                                              | <b>27.3</b>                                               |       |
| Zn-trz-ox        | 2.67                                          | 2.43                                          | 2.49                                          | 2.5                      | 36.8                                                      | 32.7                                                      | 38.7                                                      | 26    |
| NUM-9            | 1.98 <sup>c</sup>                             | 1.79 <sup>c</sup>                             | 2.06 <sup>c</sup>                             | 1.61                     | 35.79                                                     | 32.32                                                     | 35.75                                                     | 27    |
| Zr-TCA           | 2.78                                          | 2.02                                          | 2.28                                          | 2.72                     | 43.8                                                      | 23.9                                                      | 35.3                                                      | 28    |
| ZUL-100          | 3.62                                          | 2.42                                          | 2.82                                          | 2.12 <sup>b</sup>        | 36.5                                                      | 29.6                                                      | 34.2                                                      | 29    |
| ZSTU-2           | 3.11                                          | 2.35                                          | 2.73                                          | 1.62                     | 23.5                                                      | 32                                                        | 33.5                                                      | 30    |
| Zn-atz-oba       | 2.77                                          | 2.03                                          | 2.04                                          | 1.27                     | 27.5                                                      | 27.0                                                      | 30.0                                                      | 31    |
| NPU-1            | 5.1                                           | 4.2                                           | 4.5                                           | 1.32                     | 27.88                                                     | 23.95                                                     | 29.1                                                      | 32    |
| TJT-100          | 4.46                                          | 3.44                                          | 3.70                                          | 1.2                      | 31                                                        | 25                                                        | 29                                                        | 33    |
| Azole-Th-1       | 3.51                                          | 3.56                                          | 4.42                                          | 1.46                     | 25.4                                                      | 26.1                                                      | 28.6                                                      | 34    |
| BUT-321          | 4.09                                          | 3.33                                          | 3.56                                          | 1.6                      | 25.0                                                      | 28.2                                                      | 28.5                                                      | 35    |
| ZJNU-115         | 4.73                                          | 3.75                                          | 4.2                                           | 1.56                     | 29.2                                                      | 27.7                                                      | 28.2                                                      | 36    |
| HIAM-326         | 2.91                                          | 1.85                                          | 2.28                                          | 1.9                      | 24.98                                                     | 23.39                                                     | 27.54                                                     | 37    |
| MOF-303          | 7.94                                          | 5.00                                          | 5.00                                          | 1.7                      | 31.7                                                      | 24.3                                                      | 25.1                                                      | 38-39 |
| MUV-11           | 3.98                                          | 1.72                                          | 1.83                                          | 1.53                     | 20.3                                                      | 23.5                                                      | 25                                                        | 30    |

## References

1. Sheldrick, G. M. Crystal Structure Refinement with Shelxl. *Acta Crystallogr. C* **2015**, *71*, 3-8.
2. Dolomanov, O.; Bourhis, L.; Gildea, R.; Howard, J.; Puschmann, H. Olex2: A Complete Structure Solution, Refinement and Analysis Program. *J. Appl. Cryst.* **2009**, *42*, 339-341.
3. Myers, A. L.; Prausnitz, J. M. Thermodynamics of Mixed-Gas Adsorption. *AIChE J.* **1965**, *11*, 121-127.
4. Hand, D. W.; Loper, S.; Ari, M.; Crittenden, J. C. Prediction of Multicomponent Adsorption Equilibria Using Ideal Adsorbed Solution Theory. *Environ. Sci. Technol.* **1985**, *19*, 1037-1043.
5. Czepirski, L.; JagiełŁo, J. Virial-Type Thermal Equation of Gas—Solid Adsorption. *Chem. Eng. Sci.* **1989**, *44*, 797-801.
6. Fang, Y.; Bai, X.; Zhang, X.; Li, J.-R. Data-Driven Discovery of Metal–Organic Frameworks for Sieving Separation of Quinary C<sub>5</sub> Olefin Mixtures. *J. Am. Chem. Soc.* **2025**, *147*, 42016-42023.
7. Lee, K.; Howe, J. D.; Lin, L.-C.; Smit, B.; Neaton, J. B. Small-Molecule Adsorption in Open-Site Metal–Organic Frameworks: A Systematic Density Functional Theory Study for Rational Design. *Chem. Mater.* **2015**, *27*, 668-678.
8. Grimme, S. Semiempirical Gga-Type Density Functional Constructed with a Long-

Range Dispersion Correction. *J. Comput. Chem.* **2006**, *27*, 1787-1799.

9. Yang, H.; Wang, Y.; Krishna, R.; Jia, X.; Wang, Y.; Hong, A. N.; Dang, C.; Castillo, H. E.; Bu, X.; Feng, P. Pore-Space-Partition-Enabled Exceptional Ethane Uptake and Ethane-Selective Ethane–Ethylene Separation. *J. Am. Chem. Soc.* **2020**, *142*, 2222-2227.

10. Li, H.; Liu, C.; Chen, C.; Di, Z.; Yuan, D.; Pang, J.; Wei, W.; Wu, M.; Hong, M. An Unprecedented Pillar-Cage Fluorinated Hybrid Porous Framework with Highly Efficient Acetylene Storage and Separation. *Angew. Chem. Int. Edit.* **2021**, *60*, 7547-7552.

11. Li, H.-Y.; Xue, Z.-Z.; Han, S.-D.; Wang, G.-M.; He, T. A Microporous Fluorinated MOF for Efficient Separation of C<sub>2</sub>H<sub>2</sub> from C<sub>2</sub>H<sub>2</sub>/CO<sub>2</sub> and C<sub>2</sub>H<sub>2</sub>/C<sub>2</sub>H<sub>4</sub> Mixtures. *Sep. Purif. Technol.* **2025**, *357*, 130094.

12. Nugent, P. S.; Rhodus, V. L.; Pham, T.; Forrest, K.; Wojtas, L.; Space, B.; Zaworotko, M. J. A Robust Molecular Porous Material with High CO<sub>2</sub> Uptake and Selectivity. *J. Am. Chem. Soc.* **2013**, *135*, 10950-10953.

13. Mukherjee, S.; Kumar, N.; Bezrukov, A. A.; Tan, K.; Pham, T.; Forrest, K. A.; Oyekan, K. A.; Qazvini, O. T.; Madden, D. G.; Space, B.; Zaworotko, M. J. Amino-Functionalised Hybrid Ultramicroporous Materials That Enable Single-Step Ethylene Purification from a Ternary Mixture. *Angew. Chem. Int. Edit.* **2021**, *60*, 10902-10909.

14. Shivanna, M.; Otake, K.-i.; Song, B.-Q.; van Wyk, L. M.; Yang, Q.-Y.; Kumar, N.; Feldmann, W. K.; Pham, T.; Suepaul, S.; Space, B.; Barbour, L. J.; Kitagawa, S.; Zaworotko, M. J. Benchmark Acetylene Binding Affinity and Separation through Induced

Fit in a Flexible Hybrid Ultramicroporous Material. *Angew. Chem. Int. Edit.* **2021**, *60*, 20383-20390.

15. Gao, M.-Y.; Bezrukov, A. A.; Song, B.-Q.; He, M.; Nikkhah, S. J.; Wang, S.-Q.; Kumar, N.; Darwish, S.; Sensharma, D.; Deng, C.; Li, J.; Liu, L.; Krishna, R.; Vandichel, M.; Yang, S.; Zaworotko, M. J. Highly Productive C<sub>3</sub>H<sub>4</sub>/C<sub>3</sub>H<sub>6</sub> Trace Separation by a Packing Polymorph of a Layered Hybrid Ultramicroporous Material. *J. Am. Chem. Soc.* **2023**, *145*, 11837-11845.

16. You, J.; Wang, H.; Xiao, T.; Wu, X.; Zhang, L.; Lu, C.-Z. Introducing High Concentration of Hexafluorosilicate Anions into an Ultra-Microporous MOF for Highly Efficient C<sub>2</sub>H<sub>2</sub>/CO<sub>2</sub> and C<sub>2</sub>H<sub>2</sub>/C<sub>2</sub>H<sub>4</sub> Separation. *Chem. Eng. J.* **2023**, *477*, 147001.

17. Wen, H.-M.; Liao, C.; Li, L.; Yang, L.; Wang, J.; Huang, L.; Li, B.; Chen, B.; Hu, J. Reversing C<sub>2</sub>H<sub>2</sub>-CO<sub>2</sub> Adsorption Selectivity in an Ultramicroporous Metal-Organic Framework Platform. *Chem. Commun.* **2019**, *55*, 11354-11357.

18. Scott, H. S.; Shivanna, M.; Bajpai, A.; Madden, D. G.; Chen, K.-J.; Pham, T.; Forrest, K. A.; Hogan, A.; Space, B.; Perry Iv, J. J.; Zaworotko, M. J. Highly Selective Separation of C<sub>2</sub>H<sub>2</sub> from CO<sub>2</sub> by a New Dichromate-Based Hybrid Ultramicroporous Material. *ACS Appl. Mater. Interfaces.* **2017**, *9*, 33395-33400.

19. Chen, K.-J.; Scott, Hayley S.; Madden, David G.; Pham, T.; Kumar, A.; Bajpai, A.; Lusi, M.; Forrest, Katherine A.; Space, B.; Perry, John J.; Zaworotko, Michael J. Benchmark C<sub>2</sub>H<sub>2</sub>/CO<sub>2</sub> and CO<sub>2</sub>/C<sub>2</sub>H<sub>2</sub> Separation by Two Closely Related Hybrid

Ultramicroporous Materials. *Chem* **2016**, *1*, 753-765.

20. Zhang, Y.; Sun, W.; Luan, B.; Li, J.; Luo, D.; Jiang, Y.; Wang, L.; Chen, B. Topological Design of Unprecedented Metal-Organic Frameworks Featuring Multiple Anion Functionalities and Hierarchical Porosity for Benchmark Acetylene Separation. *Angew. Chem. Int. Edit.* **2023**, *62*, e202309925.

21. Zhang, Y.; Han, Y.; Luan, B.; Wang, L.; Yang, W.; Jiang, Y.; Ben, T.; He, Y.; Chen, B. Metal-Organic Framework with Space-Partition Pores by Fluorinated Anions for Benchmark C<sub>2</sub>H<sub>2</sub>/CO<sub>2</sub> Separation. *J. Am. Chem. Soc.* **2024**, *146*, 17220-17229.

22. Chen, H.; He, Y.; Han, Y.; Hu, J.; Li, J.; Jiang, Y.; Keshta, B.; Wang, L.; Zhang, Y. A New Sifsix Anion Pillared Cage MOF with Crs Topological Structure for Efficient C<sub>2</sub>H<sub>2</sub>/CO<sub>2</sub> Separation. *Chin. J. Struct. Chem.* **2025**, *44*, 100508.

23. Zhang, Y.; Hu, J.; Krishna, R.; Wang, L.; Yang, L.; Cui, X.; Duttwyler, S.; Xing, H. Rational Design of Microporous MOFs with Anionic Boron Cluster Functionality and Cooperative Dihydrogen Binding Sites for Highly Selective Capture of Acetylene. *Angew. Chem. Int. Edit.* **2020**, *59*, 17664-17669.

24. Wang, L.; Sun, W.; Zhang, Y.; Xu, N.; Krishna, R.; Hu, J.; Jiang, Y.; He, Y.; Xing, H. Interpenetration Symmetry Control within Ultramicroporous Robust Boron Cluster Hybrid MOFs for Benchmark Purification of Acetylene from Carbon Dioxide. *Angew. Chem. Int. Edit.* **2021**, *60*, 22865-22870.

25. Kumar, N.; Mukherjee, S.; Harvey-Reid, N. C.; Bezrukov, A. A.; Tan, K.; Martins, V.;

Vandichel, M.; Pham, T.; van Wyk, L. M.; Oyekan, K.; Kumar, A.; Forrest, K. A.; Patil, K. M.; Barbour, L. J.; Space, B.; Huang, Y.; Kruger, P. E.; Zaworotko, M. J. Breaking the Trade-Off between Selectivity and Adsorption Capacity for Gas Separation. *Chem* **2021**, *7*, 3085-3098.

26. Wu, T.; Yu, C.; Krishna, R.; Qiu, Z.; Pan, H.; Zhang, P.; Suo, X.; Yang, L.; Cui, X.; Xing, H. Porous Materials with Suitable Pore Size and Dual-Functional Sites for Benchmark One-Step Ethylene Purification. *AIChE J.* **2024**, *70*, e18312.

27. Yang, S.-Q.; Sun, F.-Z.; Liu, P.; Li, L.; Krishna, R.; Zhang, Y.-H.; Li, Q.; Zhou, L.; Hu, T.-L. Efficient Purification of Ethylene from C<sub>2</sub> Hydrocarbons with an C<sub>2</sub>H<sub>6</sub>/C<sub>2</sub>H<sub>2</sub>-Selective Metal–Organic Framework. *ACS Appl. Mater. Interfaces* **2021**, *13*, 962-969.

28. Liu, Y.; Xiong, H.; Chen, J.; Chen, S.; Zhou, Z.; Zeng, Z.; Deng, S.; Wang, J. One-Step Ethylene Separation from Ternary C<sub>2</sub> Hydrocarbon Mixture with a Robust Zirconium Metal–Organic Framework. *Chin. J. Chem. Eng.* **2023**, *59*, 9-15.

29. Zhang, P.; Zhong, Y.; Zhang, Y.; Zhu, Z.; Liu, Y.; Su, Y.; Chen, J.; Chen, S.; Zeng, Z.; Xing, H.; Deng, S.; Wang, J. Synergistic Binding Sites in a Hybrid Ultramicroporous Material for One-Step Ethylene Purification from Ternary C<sub>2</sub> Hydrocarbon Mixtures. *Sci. Adv.* **8**, eabn9231.

30. Liu, P.; Wang, Y.; Chen, Y.; Yang, J.; Wang, X.; Li, L.; Li, J. Construction of Saturated Coordination Titanium-Based Metal–Organic Framework for One-Step C<sub>2</sub>H<sub>2</sub>/C<sub>2</sub>H<sub>6</sub>/C<sub>2</sub>H<sub>4</sub> Separation. *Sep. Purif. Technol.* **2021**, *276*, 119284.

31. Cao, J.-W.; Mukherjee, S.; Pham, T.; Wang, Y.; Wang, T.; Zhang, T.; Jiang, X.; Tang, H.-J.; Forrest, K. A.; Space, B.; Zaworotko, M. J.; Chen, K.-J. One-Step Ethylene Production from a Four-Component Gas Mixture by a Single Physisorbent. *Nat. Commun.* **2021**, *12*, 6507.
32. Zhu, B.; Cao, J.-W.; Mukherjee, S.; Pham, T.; Zhang, T.; Wang, T.; Jiang, X.; Forrest, K. A.; Zaworotko, M. J.; Chen, K.-J. Pore Engineering for One-Step Ethylene Purification from a Three-Component Hydrocarbon Mixture. *J. Am. Chem. Soc.* **2021**, *143*, 1485-1492.
33. Hao, H.-G.; Zhao, Y.-F.; Chen, D.-M.; Yu, J.-M.; Tan, K.; Ma, S.; Chabal, Y.; Zhang, Z.-M.; Dou, J.-M.; Xiao, Z.-H.; Day, G.; Zhou, H.-C.; Lu, T.-B. Simultaneous Trapping of  $C_2H_2$  and  $C_2H_6$  from a Ternary Mixture of  $C_2H_2/C_2H_4/C_2H_6$  in a Robust Metal–Organic Framework for the Purification of  $C_2H_4$ . *Angew. Chem. Int. Edit.* **2018**, *57*, 16067-16071.
34. Xu, Z.; Xiong, X.; Xiong, J.; Krishna, R.; Li, L.; Fan, Y.; Luo, F.; Chen, B. A Robust Th-Azole Framework for Highly Efficient Purification of  $C_2H_4$  from a  $C_2H_4/C_2H_2/C_2H_6$  Mixture. *Nat. Commun.* **2020**, *11*, 3163.
35. Zhang, P.-D.; Wu, X.-Q.; Shuai, Q.; Yu, J.; Zhang, X.; Li, J.-R. Optimizing the Microenvironment of Pores in an MOF for Boosting Ethylene Purification from a Ternary-Component Mixture. *ACS Mater. Lett.* **2024**, *6*, 4632-4638.
36. Fan, L.; Zhou, P.; Wang, X.; Yue, L.; Li, L.; He, Y. Rational Construction and Performance Regulation of an In(III)–Tetraisophthalate Framework for One-Step

Adsorption-Phase Purification of C<sub>2</sub>H<sub>4</sub> from C<sub>2</sub> Hydrocarbons. *Inorg. Chem.* **2021**, *60*, 10819-10829.

37. Liu, J.; Zhou, K.; Ullah, S.; Miao, J.; Wang, H.; Thonhauser, T.; Li, J. Precise Pore Engineering of *Fcu*-Type Y-MOFs for One-Step C<sub>2</sub>H<sub>4</sub> Purification from Ternary C<sub>2</sub>H<sub>6</sub>/C<sub>2</sub>H<sub>4</sub>/C<sub>2</sub>H<sub>2</sub> Mixtures. *Small* **2023**, *19*, 2304460.

38. Wen, H.-M.; Yu, C.; Liu, M.; Lin, C.; Zhao, B.; Wu, H.; Zhou, W.; Chen, B.; Hu, J. Construction of Negative Electrostatic Pore Environments in a Scalable, Stable and Low-Cost Metal-Organic Framework for One-Step Ethylene Purification from Ternary Mixtures. *Angew. Chem. Int. Edit.* **2023**, *62*, e202309108.

39. Xian, S.; Peng, J.; Pandey, H.; Graham, W.; Yu, L.; Wang, H.; Tan, K.; Thonhauser, T.; Li, J. Simultaneous Removal of C<sub>2</sub>H<sub>2</sub> and C<sub>2</sub>H<sub>6</sub> for C<sub>2</sub>H<sub>4</sub> Purification by Robust Mofs Featuring a High Density of Heteroatoms. *J. Mater. Chem. A* **2023**, *11*, 21401-21410.
